## **Aging interacts with tumor biology to produce major changes in the immune tumor microenvironment**

Rossin Erbe<sup>1,2</sup>, Zheyu Wang<sup>2,3</sup>, Neeha Zaidi<sup>2</sup>, Michael Topper<sup>2</sup>, Stephen Baylin<sup>2</sup>, Elizabeth M Jaffee<sup>2</sup>, Hariharan Easwaran<sup>2,\*</sup>, Elana J Fertig<sup>2,4,5,\*</sup>

### Affiliations

1 McKusick-Nathans Institute of the Department of Genetic Medicine, Johns Hopkins School of Medicine, Baltimore, MD, USA

2 Department of Oncology, Sidney Kimmel Comprehensive Cancer Center, Johns Hopkins School of Medicine, Baltimore, MD, USA

3 Department of Biostatistics, Johns Hopkins Bloomberg School of Public Health, Baltimore, MD, USA

4 Department of Applied Mathematics and Statistics, Johns Hopkins University Whiting School of Engineering, Baltimore, MD, USA

5 Department of Biomedical Engineering, Johns Hopkins Bloomberg School of Medicine, Baltimore, MD, USA

\* Corresponding Author/Lead Contact

Corresponding Author:

Elana J. Fertig, PhD

Assistant Professor, Oncology

The Johns Hopkins University School of Medicine

Phone: (410)-955-4268

[ejfertig@jhmi.edu](mailto:ejfertig@jhmi.edu)

## 1 **Abstract**

2 Advanced age is strongly correlated with both increased cancer incidence and general immune  
3 decline. The immune tumor microenvironment (ITME) has been established as an important  
4 prognostic of both therapeutic efficacy and overall patient survival. Thus, age-related immune  
5 decline is an important consideration for the treatment of a large subset of cancer patients.  
6 Current studies of aging-related immune alterations are predominantly performed on non-  
7 cancerous tissue, requiring additional study into the effects of age on tumor immune infiltration.  
8 We leverage large scale transcriptional data sets from The Cancer Genome Atlas and the  
9 Genotype-Tissue Expression project to distinguish normal age-related immune alterations from  
10 age-related changes in tumor immune infiltration. We demonstrate that while there is overlap  
11 between the normal immune aging phenotype and that of the ITME, there are several changes  
12 in immune cell abundance that are specific to the ITME, particularly in T cell, NK cell, and  
13 Macrophage populations. These results suggest that aged immune cells are more susceptible to  
14 tumor suppression of cytotoxic immune cell infiltration and activity than normal tissues, which  
15 creates an unfavorable ITME in older patients in excess of normal immune decline with age and  
16 may inform the application of existing and emerging immunotherapies for this large population  
17 of patients. We additionally identify that age-related increases in tumor mutational burden are  
18 associated with decreased DNA methylation and increased expression of the immune  
19 checkpoint genes *PDL1*, *CD80*, and *LAG3* which may have implications for therapeutic  
20 application of immune checkpoint blockade in older patients.

21

## 22 **Introduction**

23 The association of cancer incidence with age is well established and the phenomenon of age-  
24 related immune decline has been recognized for even longer (Gardner, 1980). Mutations and  
25 epigenetic alterations are believed to accumulate with age and drive carcinogenesis (Tomasetti  
26 et al., 2017), (Horvath, 2013). Recent research has highlighted the specific changes that

1 contribute to the general decline of the immune system that occurs as individuals age (Aw et al.,  
2 2007). Understanding the effect such alterations have on the anti-tumor immune response is  
3 critical for the informed development and application of immunotherapies to elderly patients.  
4

5 Thus, systemic immune aging has received considerable attention in the context of its effect on  
6 cancer development and progression (Fulop et al., 2017). In particular, loss of T cell receptor  
7 (TCR) diversity (Britanova et al., 2014), decreased capacity of cytotoxic cells (Solana and  
8 Mariani, 2000), and increased inflammatory signaling (Franceschi et al., 2000) have been  
9 identified as age-related immune changes of potential relevance to cancer therapeutics and  
10 patient survival. Currently, these age-related changes in the immune system are identified  
11 predominantly in non-cancerous tissues. However, tumors actively alter immune cells and their  
12 immune microenvironment to promote disease progression and avoid targeting by the immune  
13 system, which has been identified as one of the major hallmarks of cancer (Hanahan and  
14 Weinberg, 2011). Therefore, additional aging-related shifts may occur in the immune tumor  
15 microenvironment (ITME) as a result of interactions between tumor immunosuppressive  
16 signaling and the immunosenescence phenotype.  
17

18 In the last decade, the composition of the ITME has become a subject of intense study due to its  
19 association with overall survival and therapeutic efficacy, particularly that of immune checkpoint  
20 blockade (ICB) (Frankel et al., 2017). However, any shifts in the composition of the ITME itself  
21 that may occur with age have not yet been generally characterized, with the exception of some  
22 T cell populations in melanoma (Kugel et al., 2018). Merging the disparate research on cancer  
23 and aging can further distinguish whether age-related changes in non-cancerous tissues are  
24 recapitulated within the ITME. At present, ICB immunotherapy is less often used to treat elderly  
25 patients, due to concerns about efficacy and toxicity, despite the fact that the limited clinical trial  
26 data that exists suggests that they experience no reduced benefit as compared to younger

1 patients (Kugel et al., 2018), (Elias et al., 2018), (Daste et al., 2017), (Jain et al., 2019). Age-  
2 specific characterization of the ITME is essential to understand these results and move forward  
3 with efforts to bring immunotherapy to this large group of cancer patients.

4  
5 This study directly compares the impact of aging on immune response and infiltration in tumors  
6 to that of non-cancerous tissues using genomics data from large-scale consortium studies. We  
7 apply immune cell type deconvolution methods to bulk transcriptomics data from untreated  
8 tumors samples among patients of different ages from The Cancer Genome Atlas (TCGA) and  
9 to post-mortem non-cancer tissue samples from individuals of different ages from the Genotype-  
10 Tissue Expression project (GTEx) in order to compare age-associated immune composition  
11 changes from within tumors and non-cancerous tissues. We identify decreases in overall T cell  
12 abundance in tumor samples that are not observed in systemic tissues, as well as an increase  
13 in macrophage abundance. Further, while NK abundance generally increases with age, this  
14 trend is not observed within the ITME. These cancer-specific changes are both poor prognostics  
15 based on TCGA overall survival data and the existing literature on the impact of these immune  
16 cell types in the ITME. These analyses suggest that not only do older cancer patients face the  
17 normal aspects of immune decline, but that there is a specific interaction between the senescent  
18 immune system and tumor signaling that produces a less favorable ITME for survival and  
19 therapeutic response. This represents an unappreciated interaction between tumor biology and  
20 the aging immune system that contributes to the worsening of clinical outcomes with increasing  
21 age and may suggest new treatment strategies for elderly patients. At the same time, we  
22 observe that increasing tumor mutational burden with age appears to lead to an epigenetically  
23 regulated increase in tumor expression of immune checkpoint receptors such as *PDL1*, *CD80*,  
24 and *LAG3*, which may make ICB an unexpectedly attractive therapeutic option for many older  
25 patients.

26

## 1 **Results**

### 2 Deconvolution of immune cell abundance in tumor samples from TCGA reveals an age-related 3 decrease in T cell abundance and increase in macrophage abundance that is associated with 4 decreased survival

5 The large number of primary tumor transcriptional profiles across disease subtypes available  
6 from TCGA provides a unique cohort to characterize the impact of age on the ITME. We apply  
7 the MIXTURE immune cell type deconvolution algorithm (Fernandez et al., 2019) to infer the  
8 absolute proportions of immune cell types from RNA-sequencing data derived from pan-cancer  
9 TCGA samples. We then fit a linear model with age, including cancer type (based on the 33  
10 TCGA cancer-type projects included in the study) and patient sex as covariates, for each  
11 immune cell type (listed in Supplemental Table 1) to assess changes in immune cell infiltration  
12 as patients age. We find that overall T cell abundance significantly decreases with age in the  
13 ITME (q-value = 0.00175) (Figure 1A) while macrophages significantly increase in abundance (q  
14 =  $4.45 \times 10^{-4}$ ) (Figure 1B). Detectable changes in the infiltration of NK cells, Dendritic cells, B  
15 cells, and other myeloid populations do not occur with age pan-cancer (Figure 1C, Table 1).

16  
17 We additionally investigate age-related changes in the TCGA cohort at a finer cellular resolution  
18 of 22 immune cell subtypes from MIXTURE (listed in Supplemental Table 1) (Supplemental  
19 Figure 1). Naive B cells are found to significantly decrease in abundance with increasing age in  
20 the ITME (q-value = 0.0305). Although many known systemic immune changes occur with age  
21 in healthy tissues, this reduction in Naive B cells is the only statistically significant shift among  
22 immune cell subtypes in the ITME. Consistent with our previous analysis of the higher order cell  
23 types, the three macrophage subsets (M0, M1, and M2) are among the top four cell types that  
24 trend towards increasing abundance in age. Likewise, all T cell subsets (CD8, CD4, Follicular  
25 helper, and regulatory T cells) trend towards a decrease in abundance with age with the  
26 exception of gamma delta T cells.

1  
2 To investigate the association of these age-related immune infiltration changes with patient  
3 survival, we fit a Cox proportional hazards model between overall survival and all immune cell  
4 types (both subtypes and higher order cell types), adjusting for patient age, sex, cancer type,  
5 and years of smoking (Supplemental Figure 2, Table 2). We observe that higher risk is  
6 significantly associated with lower T cell abundance ( $q = 5.38 \times 10^{-4}$ ) and NK cell abundance ( $q$   
7  $= 0.0263$ ), as well as for higher macrophage abundance ( $q = 0.00162$ ). Naive B cells were not  
8 significantly associated with survival ( $q = 1.00$ ).

9  
10 We note that both the composition of the ITME and average patient age varies by cancer type.  
11 Therefore, to determine the variance in age-related effects that occur within different cancer  
12 types, we then evaluate the association between age and immune composition for each cancer  
13 type with at least 100 samples that could be successfully deconvolved by the MIXTURE  
14 algorithm (Supplemental Figure 3). We identify considerable heterogeneity in the effect of age  
15 on immune cell type abundance across cancer types, though macrophages generally increase  
16 in abundance, while T cells generally decrease (Figure 2A), consistent with the results of our  
17 pan-cancer analysis. Breast carcinomas have the most significant decrease in T cell abundance  
18 and the most significant increase in macrophage abundance with age overall.

19  
20 To further distinguish the relative role of age and cellular composition of the ITME with patient  
21 outcomes, we then fit a Cox proportional hazards model for the effects of variation in each  
22 immune cell type across cancer types, including diagnosis age as a covariate (Figure 2B).  
23 Macrophages and other myeloid-derived cells are generally poor prognostics across cancer  
24 types, while T and NK cells are generally good prognostics. Head and neck squamous cell  
25 carcinomas (HNSC) have the most significant survival association with both macrophages and  
26 T cells. If HNSC cases are subdivided into HPV-negative and HPV-positive patients, this

1 association only recapitulates among the HPV-negative cohort, emphasizing the importance of  
2 ITME composition for HPV-negative HNSC cases.

3

4 Age-related immune changes in non-cancerous tissues differ from the observed shifts in the  
5 aging ITME among T cells, macrophages, B cells, and NK cells

6 To compare the effect of aging in the ITME to that on the immune cell compositions of normal  
7 tissues, we applied MIXTURE to GTEx consortium RNA-sequencing data of post-mortem  
8 samples from individuals without cancer (GTEx Consortium et al., 2017) to infer cell type  
9 abundance across tissues. These results provide a non-cancer baseline for immune changes  
10 that occur across many individuals of varying ages to compare with our observations from  
11 TCGA tumor data. Similar to the TCGA analysis, we fit a linear model to each cell type in order  
12 to determine associations between cell type abundance and age both across and within normal  
13 tissues.

14

15 In contrast to our findings in the pan-cancer ITME, in pan-tissue analyses we observe no  
16 significant change in overall T cell abundance with age ( $q = 0.565$ ) (Figure 3A, Supplemental  
17 Table 2). We further fail to find significant changes in macrophage levels ( $q = 0.565$ ) with age  
18 (Figure 3B). However, we do observe decreases in overall B cell ( $q = 3.51 \times 10^{-4}$ ) (Figure 3C)  
19 proportion and increases in NK cell proportion ( $q = 1.07 \times 10^{-14}$ ) (Figure 3D). This result  
20 demonstrates that there are considerable differences between the effects of aging on the  
21 abundance of immune cells in non-cancer tissues and the ITME.

22

23 Across the 22 immune cell subtypes from MIXTURE, we find that naive B cell abundance is  
24 significantly decreased in GTEx samples with increasing age, consistent with our findings in the  
25 ITME ( $q$ -value of  $9.07 \times 10^{-16}$  and 0.0305, respectively). However, among GTEx data, we also  
26 observe significant decreases in memory CD4 T cells ( $q = 3.30 \times 10^{-7}$ ), naive CD4 T cells ( $q =$

1 0.00604), M2 macrophages ( $q = 3.59 \times 10^{-5}$ ), memory B cells ( $q = 0.0315$ ), and resting dendritic  
2 cells ( $q = 0.0427$ ), as well as significant increases in abundance of resting NK cells ( $q = 5.33 \times$   
3  $10^{-11}$ ) and CD8 T cells ( $q = 0.0157$ ) (Figure 3E). These findings represent clear departures from  
4 what we observe within the ITME, suggesting that tumors interact with the aging immune  
5 system to selectively prevent or increase infiltration of certain immune cell types that exist  
6 systemically, in a way that differs from the tumor immunosuppression that occurs in younger  
7 patients.

8  
9 To directly compare normal age-related immune changes in a particular tissue to those that  
10 occur in tumors within the same tissue, we individually assay the immune associations with age  
11 for colon, lung, and breast tumors in TCGA with those found for all normal colon, lung, and  
12 breast samples from GTEx (Figure 3F, Supplemental Figure 4). Consistent with what we find  
13 pan-cancer and pan-tissues, we observe an increase in macrophage infiltration and a decrease  
14 in T cell infiltration among colorectal adenocarcinoma patients, while there is no significant  
15 change observed for colon samples from GTEx, and the non-significant trend that we do  
16 observe is reversed for both cell types. Similar immune cell type differences are found between  
17 cancerous and non-cancerous tissues in lung and breast samples. These results demonstrate  
18 that systemic age-related immune changes cannot be assumed to translate to the ITME.  
19 Particularly, they suggest that an interaction occurs between the phenotype of aging immune  
20 cells and the immunosuppressive signaling of cancers that generally increases the infiltration of  
21 macrophages and decreases the infiltration of T cells and NK cells in older patients.

22  
23 Systemic age-related increases in M1/M2 macrophage ratio and decreases in CD8/CD4 T cell  
24 ratio in non-cancerous tissues do not recapitulate in the ITME

25 We hypothesize that the tumor-specific changes to the ITME with age are associated with the  
26 modifications that cause tumors to evade immune attack. A higher ratio of M1/M2 macrophages



1 has been previously found to be a positive survival prognostic (Chanmee et al., 2014), which we  
2 evaluate using a Cox proportional hazards model for overall survival in TCGA. We find that an  
3 increased M1/M2 ratio is a generally good prognostic pan-cancer, including age and cancer  
4 type as covariates ( $q = 0.0165$ ). As the trends displayed in Figure 3E would suggest, the M1/M2  
5 macrophage ratio significantly increases ( $q = 4.12 \times 10^{-4}$ ) with age within normal tissues from  
6 GTEx data (Supplemental Figure 5A). By contrast, the M1/M2 tumor infiltration ratio does not  
7 change with age pan-cancer in tumor tissues in TCGA data ( $q = 0.314$ ) (Supplemental Figure  
8 5B), consistent with a signature of decreased immune activation relative to the rest of the body.  
9 Likewise, greater T cell killing would be expected to be associated with better prognosis. In  
10 TCGA, CD8/CD4 ratio has a minor favorable association with patient survival which falls short of  
11 0.05 statistical significance ( $q = 0.0977$ ). We observe an increase in the CD8/CD4 T cell ratio  
12 with age in GTEx samples ( $q = 2.87 \times 10^{-15}$ ) (Supplemental Figure 5C) that does not recapitulate  
13 within the ITME ( $q = 0.314$ ) (Supplemental Figure 5D).

14

15 T cell receptor clonality decreases with age within the ITME while the number of tumor  
16 mutations increases

17 The overall decline in the total number of unique T cell receptor (TCR) clones with age (Yager et  
18 al., 2008), (Britanova et al., 2014), (Egorov et al., 2018) is well established in the literature. The  
19 process of thymic involution (the loss of thymus tissue with age) eventually ends the production  
20 of naive T cells and is the major driver of normal age-related decreases in T cell clonality  
21 (Aspinall and Andrew, 2000). To quantify aging-related changes in TCR clonality in the ITME,  
22 we leveraged results previously generated with the miTCR algorithm (Bolotin et al., 2013) by  
23 (Thorsson et al., 2018) to determine the association between TCR clonality and age. We define  
24 our metric of clonal diversity as the Shannon entropy multiplied by the number of unique clones  
25 divided by the total number of TCR sequencing reads (this correction is important because we  
26 have already established that T cell abundance decreases with age and we wish to correct this

1 metric for the expected lower number of T cells to be sequenced among the samples from older  
2 patients). We determine that this TCR clonality measure significantly decreases with age for  
3 pan-cancer TCGA samples, including cancer type as a covariate ( $p = 1.48 \times 10^{-8}$ ) (Table 3,  
4 Supplemental Figure 6A). We then fit a Cox proportional hazards model with age and cancer  
5 type as covariates and determine that decreased TCR clonality is a significant negative  
6 prognostic for overall survival ( $p = 3.34 \times 10^{-5}$ ) (Table 3). This result suggests that the reduced  
7 ability to recognize antigens in older individuals leads to reduced T cell killing of tumor cells and  
8 hence worse outcomes.

9  
10 However, a related consideration is the increasing accumulation of mutations known to occur  
11 with age (Tomasetti et al., 2017) and the potential accompanying increase in immunogenic  
12 mutations. Higher tumor mutational burden has been shown to correlate with improved  
13 outcomes in ICB immunotherapy (Yarchoan et al., 2017), (Goodman et al., 2017), which  
14 suggests the possibility that the increasing number of mutations accumulated with age may in  
15 some cancers offset the loss of TCR diversity. As has been previously reported (Chalmers et  
16 al., 2017), (Qing et al., 2020), we find that tumor mutational burden significantly increases with  
17 age ( $p < 1 \times 10^{-16}$ ) (Supplemental Figure 6B) pan-cancer in TCGA, including cancer type as a  
18 covariate (Table 3). This trend recapitulates within most cancer types, though lung  
19 adenocarcinomas and uterine carcinomas are notable exceptions (Supplemental Figure 6C).  
20 High mutational burden among younger patients with lung cancer is likely due to the highly  
21 mutagenic effects of cigarette smoking, while the highly mutated uterine tumors are likely the  
22 result of a hypermutated subset previously discovered among the TCGA-UCEC cohort (Cancer  
23 Genome Atlas Research Network et al., 2013). A higher tumor mutational burden is a positive  
24 survival prognostic pan-TCGA, as determined by a Cox proportional hazards model, including  
25 age and cancer type as covariates ( $p = 0.011$ ) (Table 3). Thus, while the ability to recognize  
26 antigens may decrease with age, the space of tumor antigens for a given TCR to match with will

1 likely increase, presumably at least partially offsetting the decreased T cell capacity to recognize  
2 tumors caused by loss of TCR diversity.

3

4 Age-related increases in tumor mutational burden associates with promoter demethylation and  
5 increased expression of immune checkpoint genes in tumor samples

6 The ability of TCR sequences to recognize tumor antigens is of particular clinical relevance in  
7 the context of ICB immunotherapy. Another important factor for the efficacy of ICB  
8 immunotherapy is the expression of target genes and their complementary receptors such as  
9 *PD1*, *PDL1*, *CTLA4*, *CD80*, and *CD86* (Taube, 2014). We therefore performed differential  
10 expression analysis for these genes with age in both TCGA tumor samples and normal GTEx  
11 tissue samples, including cancer type and tissue type as respective covariates. Among TCGA  
12 samples, *CD80* and *PDL1* expression increases with age (q-values 0.0116 and 0.0299), while  
13 no detectable expression changes occur with age for *CTLA4*, *PD1*, and *CD86* (q-values of  
14 0.779, 0.693, and 0.0834) (Table 4), suggesting that older patients display increased tumor cell  
15 expression of these immune checkpoint genes. Another possibility is that this change occurs  
16 due to the increased number of infiltrating macrophages we have shown accumulate with age,  
17 as *PDL1* and *CD80* can be expressed on macrophages as well (Hartley et al., 2018). We further  
18 investigate age-related changes in expression of these genes within each cancer type  
19 (Supplemental Figure 7). There is considerable heterogeneity in the effect of age on the  
20 expression of these genes, though *PDL1*, *CD80*, and *CD86* are more likely to increase in  
21 expression with age, while *PD1* and *CTLA4* expression is more variable, suggesting that tumor  
22 expression of immune checkpoint genes is more affected by age than tumor infiltrating T cell  
23 expression of immune checkpoint genes.

24

25 Among the non-cancerous samples from GTEx, *PD1* and *PDL1* expression significantly  
26 increases with age (q-values of  $2.93 \times 10^{-7}$  and 0.00166), *CD86* expression does not

1 significantly change ( $q = 0.891$ ), and there was no data available for *CTLA4* or *CD80*  
2 (Supplemental Data). The increase in *PD1* expression is possibly due to the increased presence  
3 of exhausted CD8 T cells, which have been previously reported to accumulate with age and  
4 express both *PD1* and *TIM3* (Lee et al., 2016), the latter of which is also expressed at increased  
5 levels with advanced age in GTEx data ( $q = 2.157 \times 10^{-5}$ ). The increased inflammation observed  
6 in older individuals (Fulop et al., 2017), (Kovtonyuk et al., 2016) may explain the increased  
7 expression of *PDL1* in older individuals from GTEx. Among the inflammatory pathways up with  
8 age, we particularly note that the GO term for response to interferon gamma significantly  
9 increases in GTEx ( $q = 0.00297$ ), which has been reported to stimulate *PDL1* expression (Flies  
10 and Chen, 2007).

11  
12 Tumor mutational burden is an important clinical predictor of response to immunotherapy that  
13 increases with patient age. To determine if these age-related changes in immune checkpoint  
14 gene expression are associated with the increase in tumor mutational burden that we described  
15 previously (Supplementary Figure 6B), we included it as a covariate and repeated the  
16 differential expression analysis. *PDL1* expression no longer appeared significantly associated  
17 with age ( $q = 0.207$ ), while *CD80* expression became borderline ( $q = 0.0502$ ) (Supplemental  
18 Data). These data indicate that increased expression of *PDL1* with age most directly associates  
19 with age-related increases in tumor mutational burden.

20  
21 Due to previous work suggesting that DNA methylation regulates tumor expression of *PDL1*  
22 (Asgarova et al., 2018), (Micevic et al., 2019), we hypothesize that the observed expression  
23 increases of immune checkpoint genes are largely driven by epigenetic changes. We leverage  
24 merged 450k and 27k methylation array data from TCGA (Thorsson et al., 2018) and find that  
25 methylation of CpGs annotated to the *PDL1* promoter region significantly decreases with age  
26 pan-cancer ( $q = 3.27 \times 10^{-10}$ ), including cancer type as a covariate. Methylation of *CTLA4* and

1 *CD80* annotated CpGs also decrease with age (q values of  $4.33 \times 10^{-4}$  and  $6.01 \times 10^{-5}$ ) (Table  
2 4). These results suggest that DNA methylation changes lead to the observed expression  
3 increases in *PDL1* and *CD80* with increasing age and that age-related increases in tumor  
4 mutational burden promote selective pressure for epigenetically mediated up-regulation of  
5 *PDL1*.

6  
7 Corresponding shifts in DNA methylation and expression in TCGA samples suggest profound  
8 changes in the aging tumor microenvironment

9 In order to further investigate the role of age-related methylation changes on the ITME, we  
10 identified all genes annotated to have some immune role by InnateDB (Breuer et al., 2013)  
11 within TCGA expression and methylation data. In order to find immune genes that are regulated  
12 by age-related methylation changes at promoters of these genes, we then selected the following  
13 two sets of differentially expressed genes: those that had significant increases in expression  
14 and significant decreases in methylation with age, and those with significant decreases in  
15 expression and significant increases in methylation with age. We note that increased  
16 methylation of annotated promoter CpGs was much more likely to indicate that the  
17 corresponding gene would decrease in expression (218 anti-correlated vs 66 correlated with  
18 age) than decreased methylation was to indicate that a gene's expression would increase (113  
19 correlated vs 94 anti-correlated with age) (Supplemental Table 3).

20  
21 Among the genes with increased expression and decreased methylation in TCGA, we find the  
22 GO immune regulation term (q =  $5.90 \times 10^{-25}$ ), the regulation of T cell activation term (q =  $2.93 \times$   
23  $10^{-5}$ ), and innate immune response term (q =  $1.74 \times 10^{-11}$ ) significantly enriched (Figure 4A) (the  
24 full list of GO enrichments is available in Supplemental Data). Of particular note is the  
25 connected group of T cell regulatory genes *PDL1*, *CD80*, *LAG3*, *HAVRC2*, and *IL10*. *LAG3* has  
26 been shown to be of importance in immune infiltration and overall survival in renal cell

1 carcinoma (Klümper et al., 2020), acts as an important player in intratumoral T cell exhaustion in  
2 lymphoma (Yang et al., 2017), and has been suggested as a potential therapeutic target for new  
3 ICB strategies (Long et al., 2018). *HAVRC2* (also known as *TIM3*) has been shown to be an  
4 important inhibitory T cell receptor, as well as a defining characteristic of exhausted T cells in  
5 concert with *PD1* (Lee et al., 2016), (Wolf et al., 2020). *IL10* has been shown to be a direct  
6 inhibitor of CD8 T cell function (Smith et al., 2018). We thus observe a set of methylation-  
7 associated expression changes with increasing age that are expected to have a considerable  
8 detrimental effect on T cell tumor killing.

9  
10 Next, we investigated if these methylation and expression changes are related to the age-  
11 associated TMB changes, like we observed for *PDL1* and *CD80*. We performed the same  
12 analysis of immune-related genes in InnateDB, adjusting for tumor mutational burden for both  
13 differential expression and methylation, and only *IL10* retains significantly increased expression  
14 and decreased methylation of the aforementioned five genes (Figure 4B). Therefore, the effect  
15 of age on T cell activation in our model seems to be largely explained by age-related changes in  
16 tumor mutational burden, while other age-related factors have a larger impact on the increased  
17 expression of a number of genes related predominantly to innate immunity. For example,  
18 another 9 genes annotated to the innate immune response GO term are significant for the TMB  
19 corrected analysis (25 vs 34 total).

20  
21 The genes with increased CpG methylation and decreased expression with age in TCGA  
22 samples are significantly enriched for a number of GO terms, notably including cell adhesion ( $q$   
23 =  $9.38 \times 10^{-44}$ ), cell differentiation ( $q = 5.83 \times 10^{-31}$ ), locomotion ( $q = 1.84 \times 10^{-21}$ ), and  
24 extracellular matrix organization ( $q = 6.18 \times 10^{-21}$ ) (Figure 4C) (full list provided in Supplemental  
25 Data). This gene set also includes several growth factors and receptors with major known roles  
26 in tumor biology, such as *EGFR* (Normanno et al., 2006), *FGF2* (Soufla et al., 2005), *PDGFRA*

1 (Velghe et al., 2014), and *IGF1R* (Pandini et al., 1999). All of these terms and genes remain  
2 significant after correcting for tumor mutational burden (Figure 4D), though major transcription  
3 factors such as *SOX4* and *FOXO1* drop out, as do the growth factors *TGFB2* and *NGF*,  
4 indicating that high mutational burden may play a role in age-related gene methylation for a  
5 subset of these genes. However, most of these gene expression and methylation changes  
6 appear to be mediated through other age-related effects. Epigenetic silencing of these pathways  
7 and genes would be expected to have a considerable effect on the tumor microenvironment, as  
8 they play major roles in critical tumor processes such as growth, metastasis, dedifferentiation,  
9 and angiogenesis.

10

11 GO gene set enrichment differences between TCGA and GTEx data with age suggest  
12 interactions of tumor signaling and aging biology produce substantial changes in tumor cellular  
13 processes and microenvironment

14 To further investigate possible causes for the observed differences in immune infiltration  
15 between aged tumors and healthy aged tissues, we compare GO term enrichment based on  
16 gene expression changes with age from TCGA and GTEx samples. We primarily investigate  
17 four sets of GO terms: those up in both TCGA and GTEx with age, those up in TCGA and down  
18 in GTEx, those up in GTEx and down in TCGA, and those down in both TCGA and GTEx  
19 (Supplemental Figure 8) (full list of GO terms provided in Supplemental Data). The pathways up  
20 in both are highly immune related, indicating an increase in inflammation with age that has  
21 previously been termed inflammaging (Fulop et al., 2017), (Franceschi et al., 2000). The  
22 increases in antigen binding, MHC complex, and Interferon gamma signaling terms are of  
23 relevance to T cell recognition and activity. Of particular note may be the increase in Interferon  
24 gamma signaling, which is known have a role upregulating *PDL1* expression (Flies and Chen,  
25 2007), and thus may be involved in the expression increase of *PDL1* with age, along with the  
26 previously noted relation to tumor mutational burden. Among those pathways up in TCGA and

1 down in GTEx, the Mitochondrion term seems the most potentially relevant, as energetics is a  
2 major factor in tumor biology, and mitochondria additionally play a considerable role in  
3 regulating cell death pathways as well as immune regulation (Weinberg et al., 2015), (Breda et  
4 al., 2019). Regulation of proliferation, positive regulation of development, locomotion, and  
5 biological adhesion are up in GTEx and down in TCGA, with potential relevance for tumor  
6 growth and metastasis. These terms match closely with the terms found to be silenced by DNA  
7 methylation with age in the previous section, indicating that these are cancer specific age-  
8 related effects as well. There thus appears to be another interaction of aging biology and tumor  
9 signaling that may alter the development of several major hallmarks of cancer in older patients.  
10 Finally, cell cycle terms are down in both cohorts with increasing age. In the context of the  
11 altered age-related immune infiltration in tumors compared to normals, these data demonstrate  
12 that there are inflammation increases with age in both tumor and healthy aged tissues. Thus,  
13 the observed changes in immune cell abundance between the tumors of old patients and the  
14 tissues of old individuals are likely the result of an interaction between tumor  
15 immunosuppressive signaling and the altered phenotype of aged immune cells.

16

## 17 **Discussion**

18 We demonstrate that patient age associates with several changes in ITME composition that do  
19 not occur in non-cancerous tissues. This result indicates that tumor signaling interacts with the  
20 aging immune system and/or environment to modulate immune infiltration and produce a more  
21 immunosuppressive microenvironment in older patients than would be predicted by normal  
22 immune aging in isolation. We further investigate the complex interplay of age-related shifts in  
23 TCR clonality, tumor mutational burden, and T cell exhaustion that appear to modulate the  
24 demethylation and increased expression of immune checkpoint genes in the tumors of older  
25 patients.

26



1 In contrast to our analysis of ITME cell type composition shifts with age, there is an existing  
2 literature on normal age-related immune changes, which allows for validation of the results of  
3 the MIXTURE method in this work with an established base of knowledge. The observed  
4 decreases in overall T cell abundance within tumors did not recapitulate in normals from GTEx  
5 and have not been reported to occur systemically. While this may seem a strange phenomenon  
6 given the process of thymic involution, it has been previously found that it is mostly naive T cells  
7 that decrease in abundance with age, while the population of memory T cells proportionally  
8 increases (with accumulation of exhausted, less functional effector T cells as individuals reach  
9 very advanced age) (Hulstaert et al., 1994), (Alpert et al., 2019). Thus, overall T cell abundance  
10 remains relatively constant, as we observe in our analysis of GTEx data. This ITME specific  
11 departure may have implications for T cell based immunotherapies in elderly patients,  
12 suggesting the possibility of targeting the as of yet unknown mechanism repressing infiltration to  
13 potentially improve therapeutic efficacy in older patients.

14

15 We observe increased infiltration of macrophages in tumor samples, without a particular bias in  
16 M1/M2 polarization, while in normal GTEx data we identify no change in macrophage  
17 abundance overall, but find that the M1/M2 ratio increases. Previous studies have suggested  
18 that old age alters macrophage polarization such that the same signals that would produce  
19 polarization in younger individuals do not produce differentiated macrophages with all the  
20 characteristics generally ascribed to M1 and M2 subtypes (Mahbub et al., 2012). Thus, these  
21 results must be interpreted carefully, but an increase in tumor infiltrating macrophages still  
22 appears to be a poor survival prognostic in older individuals, which suggests that therapeutics  
23 being developed to target the generally negative effects of tumor-associated macrophages  
24 (Chanmee et al., 2014), (Poh and Ernst, 2018), (Lee et al., 2019) may be of particular impact in  
25 patients of advanced age.

26

1 A further observation of note is that we find a significant increase in NK cell abundance in GTEx,  
2 which we do not identify in TCGA tumor data. It has been previously shown that overall NK cell  
3 abundance increases with age, though their cytotoxicity was diminished relative to younger  
4 controls (Gounder et al., 2018). It therefore seems that NK cell tumor infiltration is inhibited with  
5 increasing patient age because this general increase in abundance is not reflected in the ITME.  
6 The role of NK cells in cancer immunity is gaining increasing appreciation (Freeman et al.,  
7 2019), (Chiossone et al., 2018), with some evidence to suggest an important role in emerging  
8 immunotherapies as well (Shimasaki et al., 2020).

9  
10 Systemic loss of TCR clonality with age (Britanova et al., 2014) is reflected in the ITME, which,  
11 along with the decreased T cell infiltration we identify, raises questions about the efficacy of  
12 immunotherapies in patients of advanced age due to the value of TCR diversity as a biomarker  
13 to identify patients who will benefit from ICB immunotherapy (McNeel, 2016). The possibility of  
14 reduced efficacy has been partially addressed by previous studies. There are somewhat mixed  
15 results as to the benefit of ICB for patients of advanced age, though most studies and meta-  
16 analyses of available clinical trial data suggest patients experience no reduced benefit (Kugel et  
17 al., 2018), (Elias et al., 2018), (Daste et al., 2017), (Jain et al., 2019). The observed increases in  
18 tumor mutational burden with age may explain these results at least partially, as these additional  
19 mutations provide a larger space of antigens for the reduced number of unique TCRs to  
20 recognize. We further find that the tumor mutational burden increases with age appear to  
21 mediate a decrease in methylation and increase in expression of PDL1, though we cannot rule  
22 out that age-related increases in Interferon gamma signaling play a role as well. From these  
23 results, we hypothesize the causal model outlined in Supplemental Figure 10, whereby TCR  
24 Diversity, Tumor mutational burden, and T cell infiltration changes with age together mediate the  
25 cytotoxic capacity of T cells on tumors and thus the selective pressure for the expression of  
26 immune checkpoint genes. Given the results of the aforementioned meta-analyses, this model

1 suggests that increased tumor mutational burden (and the corresponding increase in PDL1  
2 expression) is largely able to compensate for the loss of T cell infiltration and TCR diversity such  
3 that older patients end up doing roughly as well on ICB immunotherapy as their younger  
4 counterparts despite several characteristics that are generally disadvantageous, though  
5 unaccounted factors may be at play as well. Currently, ICB is still used less often among elderly  
6 patients (Jain et al., 2019), (Hurez et al., 2018) due to concerns about efficacy and safety. Our  
7 results indicate that older individuals express increased levels of PDL1, which likely allows for  
8 the equal level of response to that of younger patients. This suggests that ICB use for the  
9 elderly should be further investigated and likely expanded. Additionally, our model suggests that  
10 if T cell infiltration into the tumors of older patients can be increased, they might respond even  
11 better to ICB immunotherapy than young patients do.

12  
13 We identify a set of genes that are hypermethylated and lower-expressed with increasing age.  
14 These genes are significantly associated with growth, metastasis, and angiogenesis, which are  
15 considered to be some of the hallmarks of cancer (Hanahan and Weinberg, 2011). We further  
16 find that these terms are not enriched among GTEx samples with age, demonstrating another  
17 interaction between aging biology and tumor biology that produces an age-related tumor  
18 phenotype that is distinct from the age-related phenotype in normal tissues. Within this set of  
19 genes we observe what appears to be DNA methylation-mediated silencing of genes associated  
20 with cell differentiation, which previous studies (Widschwendter et al., 2007), (Easwaran et al.,  
21 2012), (Ohm and Baylin, 2007), (Schlesinger et al., 2007) indicate represents a tumor-specific  
22 hypermethylation of genes that locks the constituent cells into a malignant stem-like state.  
23 These changes appear to be more common in the tumors of elderly patients, suggesting  
24 epigenetic therapies may be of particular value in this population.

25

1 Given the age-related differences in immune infiltration observed, we identified both the  
2 differences and similarities in GO term enrichment with age for TCGA and GTEx samples.  
3 Inflammation and immune terms are up in both, including interferon gamma signaling, which  
4 likely has some impact on the observed increase in PDL1 expression (Flies and Chen, 2007).  
5 The differences in enrichment, however, are largely not directly immune related and do not  
6 ostensibly explain the observed differences in immune infiltration. However, some of these  
7 pathway differences, such as increased mitochondrial activity in tumors with age and decreased  
8 activity in normal aged tissues, may merit future investigation due to the potential role these  
9 changes may play on cellular energetics and survival.

10

11 To determine if age-related tumor mutational burden increases mediate the immune infiltration  
12 changes we observe with age, we included it as a covariate in analyses of immune infiltration  
13 derived from MIXTURE. We determined none of our observations changed substantially  
14 (Supplemental Data), demonstrating that the observed differences are mediated through other  
15 age-related factors. Thus, we conclude the T cell infiltration decreases, macrophage infiltration  
16 increases, and NK infiltration stability despite an increasing abundance in the body overall is  
17 most likely attributable to the hypothesis that exhausted or senescent phenotypes develop in  
18 immune cells as individuals age and make the immune cells of older patients more sensitive to  
19 the immunosuppressive signaling that is produced by most tumors (Lu et al., 2019). Another  
20 possibility is that some other aspect of aging biology extrinsic to immune cells interacts with the  
21 dysregulated signaling from tumors to prevent immune infiltration of certain cell types. However,  
22 these investigations do not provide any particular evidence of what that actor might be and  
23 therefore the former hypothesis should be favored by virtue of parsimony. Additional  
24 investigation is needed to determine whether either of these proposed mechanisms drives our  
25 observations, but they suggest the possibility of therapeutics targeting the immune senescence

1 phenotype or the interaction of said phenotype and tumor immunosuppressive signaling to  
2 improve outcomes for older cancer patients.

3

4 It is important to note the limitations of bulk expression data for the analysis of tumor-infiltrating  
5 immune cells. Possibly most importantly is the consideration of immune cell function and quality  
6 (e.g. the question of whether T cells are exhausted or non-functioning is difficult to address from  
7 bulk data). Further, immune cell type deconvolution of bulk data does not lend itself to as  
8 thorough an exploration of immune subtypes as at single-cell resolution. Therefore, future  
9 single-cell pan-cancer characterization from projects such as the Human Tumor Atlas Network  
10 (Rozenblatt-Rosen et al., 2020) and normal tissue through the Human Cell Atlas are critical to  
11 further delineate the role that aging-related changes to immune cell function play in cancer.  
12 Nonetheless, characterization of the impact aging has on the ITME from bulk data can be a  
13 significant aid in the informed treatment of elderly patients.

14

15 Overall, these results suggest that patients of advanced age may benefit from immune  
16 modulation that promotes infiltration of immune cells that are already present in their body to  
17 produce a more favorable environment for therapeutic response and survival. Additionally, our  
18 results, along with previous meta-analyses of clinical trials, suggest that ICB use in elderly  
19 patients merits further study and expansion. Finally, these findings indicate that to fully  
20 appreciate the tumor biology and treatment needs of older patients, specific study into the  
21 effects of age in cancer is necessary, as we cannot necessarily rely on studies of aging in  
22 general to accurately describe the effects of age in tumors.

23

## 24 **Methods**

### 25 RNA-Sequencing Data

1 TCGA RNA-sequencing data processed and normalized according to  
2 [https://docs.gdc.cancer.gov/Data/Bioinformatics\\_Pipelines/Expression\\_mRNA\\_Pipeline/](https://docs.gdc.cancer.gov/Data/Bioinformatics_Pipelines/Expression_mRNA_Pipeline/) was  
3 downloaded from the GDC Data Portal on August 8th, 2019, filtering for all TCGA samples with  
4 patients above 30 years of age. Patients under 30 were excluded to focus on ITME changes in  
5 adult populations, which are more likely to generalize to the majority of cancer patients.

6  
7 GTEx RNA-sequencing counts version 8 were downloaded from the GTEx Portal on November  
8 12th, 2019. Only individuals over 30 were included in the final analysis, to be comparable with  
9 filtering of TCGA. Characteristics of these cohorts are listed in Supplemental Table 4.

10

#### 11 Immune Cell Type Deconvolution from Bulk RNA-Sequencing Data

12 The MIXTURE algorithm (Fernandez et al., 2019) builds on the nu-Support Vector Regression  
13 framework used by CIBERSORT (Newman et al., 2015) for particular use with noisy tumor  
14 samples. MIXTURE applies Recursive Feature Selection to make the cell type deconvolution  
15 more robust to noise and collinearity, and was thus designed to improve performance on tumor  
16 data.

17

18 We run MIXTURE using a population-based null distribution and the nu-SVM Robust RFE  
19 method on the preprocessed RNA-sequencing data from both TCGA and GTEx. A signature  
20 expression matrix (LM22 from Newman et al) (Newman et al., 2015) is used to determine the  
21 proportion of 22 immune cell types in each sample. MIXTURE returns both relative and absolute  
22 proportions of immune cells. Absolute proportions were used for all analyses of TCGA and  
23 GTEx datasets. MIXTURE provides a p-value for the cell type deconvolution performed. Only  
24 samples with a deconvolution p-value less than 0.05 were used in the final analyses, leaving  
25 3576 patient samples remaining in TCGA and 1689 in GTEx. A further 29 TCGA patients had  
26 received treatment prior to sample collection, and were removed to avoid biasing of results.

1  
2  
3  
4  
5  
6  
7  
8  
9  
10  
11  
12  
13  
14  
15  
16  
17  
18  
19  
20  
21  
22  
23  
24  
25  
26

## Modeling the Association of Immune Cell Type with Age and Survival

Linear models are fit to investigate the association between the absolute proportion of each immune cell type and the initial diagnosis age in TCGA. The models are fit separately for each cancer type as well as jointly with cancer type and patient sex as covariates. Significance is assessed using Benjamini-Hochberg FDR correction for multiple testing across all cell types tested.

Higher order cell types are defined by adding together individual substituent cell type values and dividing by the sum of all cell types, the result of which is used as the predictor variable in the linear model (which immune subtypes correspond to which higher order cell types is shown in Supplemental Table 1).

In addition to the linear models, we made box and violin plots of the immune cell type absolute proportion by age group without additional covariate adjustment to visualize immune changes with age.

The relationships between overall survival and immune cell types are assessed using a Cox proportional hazards model fit with the survival R package Version 3.1-8. The model uses months of overall survival as the outcome and includes diagnosis age and sex as covariates. It is further stratified by cancer type.

GTEx data only provides the age group of each individual rather than the particular year of age at the time of sample collection, so an ANOVA is performed between absolute immune cell proportion and age group, including age and tissue type as covariates.

## 1 Modeling the Age Associations of Normalized TCR Clonality and Number of Tumor Mutations

2 TCR clonality is assessed using miTCR (Bolotin et al., 2013) results previously published by  
3 Thorsson et al., 2018 (Thorsson et al., 2018). Our previous results demonstrated decreased  
4 infiltration of T cells with increasing age, so to avoid biasing our results, the Shannon Entropy is  
5 multiplied by the number of unique TCR clones divided by the total number of TCR reads. We  
6 then fit a linear model for the association of age with this TCR clonality measure, including  
7 patient sex and cancer type as covariates. We again use a Cox Proportional hazards model to  
8 assess if normalized TCR clonality is a relevant survival prognostic, using the same survival  
9 function and covariates as described above.

10

11 To find the association of age and number of tumor mutations we downloaded the mutation  
12 count provided for each sample from the GDC data portal. We log transformed the data due to  
13 the skewed distribution of tumor mutation counts and fit the values to a linear model and Cox  
14 proportional hazards model, using the same covariates as above.

15

## 16 Differential Expression Analysis with Age

17 Differential expression analyses from both TCGA and GTEx data were performed on all  
18 samples from individuals of at least 30 years of age. The edgeR package Version 3.26.8 was  
19 used for normalization and identifying differentially expressed genes with age. Diagnosis age  
20 was modeled as a continuous variable, including cancer type as a covariate for the TCGA  
21 analysis and tissue type as a covariate for the GTEx analysis. Genes were considered  
22 differentially expressed below an FDR adjusted p-value of 0.05. A further differential expression  
23 analysis was performed on TCGA data, including mutation count as an additional covariate.  
24 Finally, a differential expression analysis for diagnosis age was performed on each cancer type  
25 separately that had at least 100 samples.

26



## 1 Differential Methylation Analysis with Age

2 Merged 450k and 27k DNA methylation array data preprocessed by (Thorsson et al., 2018) was  
3 downloaded from GDC at <https://gdc.cancer.gov/about-data/publications/panimmune>. A linear  
4 model for diagnosis age was fit to data from each CpG, including cancer type as a covariate.  
5 CpG methylation was considered significantly different with age if the FDR adjusted p-value for  
6 the diagnosis age term was less than 0.05. Annotations of CpG sites to gene promoters were  
7 retrieved from the IlluminaHumanMethylation27k.db R package Version 1.4.8. The same  
8 analysis was repeated, additionally including mutation count as a covariate in the model.

9

## 10 Finding Epigenetically Regulated Immune Genes

11 Genes annotated to have an association with immune function were downloaded from InnateDB  
12 (Breuer et al., 2013), (Lynn et al., 2008). Differentially expressed genes were subset to those  
13 overlapping with the set annotated as immune-related. These sets were then further subset to  
14 those that were up-expressed with age and down-methylated, as well as those down-expressed  
15 with age and up-methylated, in accordance with the canonical understanding of the effects of  
16 DNA methylation on gene expression.

17

18 These sets were produced for both the analysis including and not including mutation count as a  
19 covariate. The resulting gene sets were visualized using the STRING database (Szklarczyk et  
20 al., 2019), which shows the known or predicted interactions that the corresponding proteins  
21 would be expected to have.

22

## 23 Gene Set Enrichment Analysis

24 The fgsea R package version 1.10.1 (Sergushichev, 2016) was used to perform gene set  
25 enrichment analysis from differential expression results with age from TCGA and GTEx,  
26 produced as described above. GO terms were downloaded from MsigDB (Liberzon et al., 2011)

- 1 using the msigdb R package Version 7.0.1. GO enrichment was compared between the data
- 2 sets, identifying those terms significantly up in both, up in one and down in the other, and down
- 3 in both with age.

## Code Availability

All analysis code is available on GitHub at: <https://github.com/rossinerbe/ImmuneAgingAnalysis>

## Acknowledgements

The authors would like to thank Ashani T. Weeraratna for her input on aging immunity in cancer.

The authors would also like to thank Mara R. Lanis for her helpful discussions on TCR diversity and immune checkpoint genes.

The results shown here are based upon data generated by the TCGA Research Network:

<https://www.cancer.gov/tcga> and the The Genotype-Tissue Expression (GTEx) Project

<https://www.gtexportal.org/>.

## Declaration of Interests

The authors declare no competing interests.

## References

Alpert, A., Pickman, Y., Leipold, M., Rosenberg-Hasson, Y., Ji, X., Gaujoux, R., Rabani, H., Starosvetsky, E., Kveler, K., Schaffert, S., et al. (2019). A clinically meaningful metric of immune age derived from high-dimensional longitudinal monitoring. *Nat. Med.* 25, 487–495.

Asgarova, A., Asgarov, K., Godet, Y., Peixoto, P., Nadaradjane, A., Boyer-Guittaut, M., Galaine, J., Guenat, D., Mougey, V., Perrard, J., et al. (2018). PD-L1 expression is regulated by both DNA methylation and NF- $\kappa$ B during EMT signaling in non-small cell lung carcinoma. *Oncoimmunology* 7, e1423170.

Aspinall, R., and Andrew, D. (2000). Thymic involution in aging. *J. Clin. Immunol.* 20, 250–256.

Aw, D., Silva, A.B., and Palmer, D.B. (2007). Immunosenescence: emerging challenges for an ageing population. *Immunology* 120, 435–446.

Bolotin, D.A., Shugay, M., Mamedov, I.Z., Putintseva, E.V., Turchaninova, M.A., Zvyagin, I.V., Britanova, O.V., and Chudakov, D.M. (2013). MiTCR: software for T-cell receptor sequencing data analysis. *Nat. Methods* 10, 813–814.

- Breda, C.N. de S., Davanzo, G.G., Basso, P.J., Saraiva Câmara, N.O., and Moraes-Vieira, P.M.M. (2019). Mitochondria as central hub of the immune system. *Redox Biol.* 26, 101255.
- Breuer, K., Foroushani, A.K., Laird, M.R., Chen, C., Sribnaia, A., Lo, R., Winsor, G.L., Hancock, R.E.W., Brinkman, F.S.L., and Lynn, D.J. (2013). InnateDB: systems biology of innate immunity and beyond--recent updates and continuing curation. *Nucleic Acids Res.* 41, D1228-33.
- Britanova, O.V., Putintseva, E.V., Shugay, M., Merzlyak, E.M., Turchaninova, M.A., Staroverov, D.B., Bolotin, D.A., Lukyanov, S., Bogdanova, E.A., Mamedov, I.Z., et al. (2014). Age-related decrease in TCR repertoire diversity measured with deep and normalized sequence profiling. *J. Immunol.* 192, 2689–2698.
- Cancer Genome Atlas Research Network, Kandoth, C., Schultz, N., Cherniack, A.D., Akbani, R., Liu, Y., Shen, H., Robertson, A.G., Pashtan, I., Shen, R., et al. (2013). Integrated genomic characterization of endometrial carcinoma. *Nature* 497, 67–73.
- Chalmers, Z.R., Connelly, C.F., Fabrizio, D., Gay, L., Ali, S.M., Ennis, R., Schrock, A., Campbell, B., Shlien, A., Chmielecki, J., et al. (2017). Analysis of 100,000 human cancer genomes reveals the landscape of tumor mutational burden. *Genome Med.* 9, 34.
- Chanmee, T., Ontong, P., Konno, K., and Itano, N. (2014). Tumor-associated macrophages as major players in the tumor microenvironment. *Cancers (Basel)* 6, 1670–1690.
- Chiossone, L., Dumas, P.-Y., Vienne, M., and Vivier, E. (2018). Natural killer cells and other innate lymphoid cells in cancer. *Nat. Rev. Immunol.* 18, 671–688.
- Daste, A., Domblides, C., Gross-Goupil, M., Chakiba, C., Quivy, A., Cochin, V., de Mones, E., Larmonier, N., Soubeyran, P., and Ravaud, A. (2017). Immune checkpoint inhibitors and elderly people: A review. *Eur. J. Cancer* 82, 155–166.
- Easwaran, H., Johnstone, S.E., Van Neste, L., Ohm, J., Mosbrugger, T., Wang, Q., Aryee, M.J., Joyce, P., Ahuja, N., Weisenberger, D., et al. (2012). A DNA hypermethylation module for the stem/progenitor cell signature of cancer. *Genome Res.* 22, 837–849.
- Egorov, E.S., Kasatskaya, S.A., Zubov, V.N., Izraelson, M., Nakonechnaya, T.O., Staroverov, D.B., Angius, A., Cucca, F., Mamedov, I.Z., Rosati, E., et al. (2018). The changing landscape of naive T cell receptor repertoire with human aging. *Front. Immunol.* 9, 1618.
- Elias, R., Giobbie-Hurder, A., McCleary, N.J., Ott, P., Hodi, F.S., and Rahma, O. (2018). Efficacy of PD-1 & PD-L1 inhibitors in older adults: a meta-analysis. *J. Immunother. Cancer* 6, 26.
- Fernandez, E., Mahmoud, Y.D., Veigas, F., Rocha, D., Balzarini, M., Lujan, H.D., Rabinovich, G.A., and Girotti, M.R. (2019). MIXTURE: an improved algorithm for immune tumor microenvironment estimation based on gene expression data. *BioRxiv*.
- Flies, D.B., and Chen, L. (2007). The new B7s: playing a pivotal role in tumor immunity. *J. Immunother.* 30, 251–260.
- Franceschi, C., Bonafè, M., Valensin, S., Olivieri, F., De Luca, M., Ottaviani, E., and De Benedictis, G. (2000). Inflamm-aging. An evolutionary perspective on immunosenescence. *Ann. N. Y. Acad. Sci.* 908, 244–254.

Frankel, T., Lanfranca, M.P., and Zou, W. (2017). The role of tumor microenvironment in cancer immunotherapy. *Adv. Exp. Med. Biol.* 1036, 51–64.

Freeman, A.J., Vervoort, S.J., Ramsbottom, K.M., Kelly, M.J., Michie, J., Pijpers, L., Johnstone, R.W., Kearney, C.J., and Oliaro, J. (2019). Natural Killer Cells Suppress T Cell-Associated Tumor Immune Evasion. *Cell Rep.* 28, 2784-2794.e5.

Fulop, T., Larbi, A., Dupuis, G., Le Page, A., Frost, E.H., Cohen, A.A., Witkowski, J.M., and Franceschi, C. (2017). Immunosenescence and Inflamm-Aging As Two Sides of the Same Coin: Friends or Foes? *Front. Immunol.* 8, 1960.

Gardner, I.D. (1980). The effect of aging on susceptibility to infection. *Rev. Infect. Dis.* 2, 801–810.

Goodman, A.M., Kato, S., Bazhenova, L., Patel, S.P., Frampton, G.M., Miller, V., Stephens, P.J., Daniels, G.A., and Kurzrock, R. (2017). Tumor mutational burden as an independent predictor of response to immunotherapy in diverse cancers. *Mol. Cancer Ther.* 16, 2598–2608.

Gounder, S.S., Abdullah, B.J.J., Radzuanb, N.E.I.B.M., Zain, F.D.B.M., Sait, N.B.M., Chua, C., and Subramani, B. (2018). Effect of aging on NK cell population and their proliferation at ex vivo culture condition. *Anal Cell Pathol (Amst)* 2018, 7871814.

GTEX Consortium, Laboratory, Data Analysis & Coordinating Center (LDACC)—Analysis Working Group, Statistical Methods groups—Analysis Working Group, Enhancing GTEX (eGTEX) groups, NIH Common Fund, NIH/NCI, NIH/NHGRI, NIH/NIMH, NIH/NIDA, Biospecimen Collection Source Site—NDRI, et al. (2017). Genetic effects on gene expression across human tissues. *Nature* 550, 204–213.

Hanahan, D., and Weinberg, R.A. (2011). Hallmarks of cancer: the next generation. *Cell* 144, 646–674.

Hartley, G.P., Chow, L., Ammons, D.T., Wheat, W.H., and Dow, S.W. (2018). Programmed Cell Death Ligand 1 (PD-L1) Signaling Regulates Macrophage Proliferation and Activation. *Cancer Immunol. Res.* 6, 1260–1273.

Horvath, S. (2013). DNA methylation age of human tissues and cell types. *Genome Biol.* 14, R115.

Hulstaert, F., Hannel, I., Deneys, V., Munhyeshuli, V., Reichert, T., De Bruyere, M., and Strauss, K. (1994). Age-related changes in human blood lymphocyte subpopulations. II. Varying kinetics of percentage and absolute count measurements. *Clin. Immunol. Immunopathol.* 70, 152–158.

Hurez, V., Padrón, Á., Svatek, R.S., and Curiel, T.J. (2018). Considerations for successful cancer immunotherapy in aged hosts. *Exp. Gerontol.* 107, 27–36.

Jain, V., Hwang, W.-T., Venigalla, S., Nead, K.T., Lukens, J.N., Mitchell, T.C., and Shabason, J.E. (2019). Association of Age with Efficacy of Immunotherapy in Metastatic Melanoma. *Oncologist*.

Klümper, N., Ralser, D.J., Bawden, E.G., Landsberg, J., Zarbl, R., Kristiansen, G., Toma, M., Ritter, M., Hölzel, M., Ellinger, J., et al. (2020). LAG3 (LAG-3, CD223) DNA methylation

correlates with LAG3 expression by tumor and immune cells, immune cell infiltration, and overall survival in clear cell renal cell carcinoma. *J. Immunother. Cancer* 8.

Kovtonyuk, L.V., Fritsch, K., Feng, X., Manz, M.G., and Takizawa, H. (2016). Inflamm-Aging of Hematopoiesis, Hematopoietic Stem Cells, and the Bone Marrow Microenvironment. *Front. Immunol.* 7, 502.

Kugel, C.H., Douglass, S.M., Webster, M.R., Kaur, A., Liu, Q., Yin, X., Weiss, S.A., Darvishian, F., Al-Rohil, R.N., Ndoye, A., et al. (2018). Age Correlates with Response to Anti-PD1, Reflecting Age-Related Differences in Intratumoral Effector and Regulatory T-Cell Populations. *Clin. Cancer Res.* 24, 5347–5356.

Lee, C., Jeong, H., Bae, Y., Shin, K., Kang, S., Kim, H., Oh, J., and Bae, H. (2019). Targeting of M2-like tumor-associated macrophages with a melittin-based pro-apoptotic peptide. *J. Immunother. Cancer* 7, 147.

Lee, K.-A., Shin, K.-S., Kim, G.-Y., Song, Y.C., Bae, E.-A., Kim, I.-K., Koh, C.-H., and Kang, C.-Y. (2016). Characterization of age-associated exhausted CD8<sup>+</sup> T cells defined by increased expression of Tim-3 and PD-1. *Aging Cell* 15, 291–300.

Liberzon, A., Subramanian, A., Pinchback, R., Thorvaldsdóttir, H., Tamayo, P., and Mesirov, J.P. (2011). Molecular signatures database (MSigDB) 3.0. *Bioinformatics* 27, 1739–1740.

Long, L., Zhang, X., Chen, F., Pan, Q., Phiphatwatchara, P., Zeng, Y., and Chen, H. (2018). The promising immune checkpoint LAG-3: from tumor microenvironment to cancer immunotherapy. *Genes Cancer* 9, 176–189.

Lu, C., Rong, D., Zhang, B., Zheng, W., Wang, X., Chen, Z., and Tang, W. (2019). Current perspectives on the immunosuppressive tumor microenvironment in hepatocellular carcinoma: challenges and opportunities. *Mol. Cancer* 18, 130.

Lynn, D.J., Winsor, G.L., Chan, C., Richard, N., Laird, M.R., Barsky, A., Gardy, J.L., Roche, F.M., Chan, T.H.W., Shah, N., et al. (2008). InnateDB: facilitating systems-level analyses of the mammalian innate immune response. *Mol. Syst. Biol.* 4, 218.

Mahbub, S., Deburghgraeve, C.R., and Kovacs, E.J. (2012). Advanced age impairs macrophage polarization. *J. Interferon Cytokine Res.* 32, 18–26.

McNeel, D.G. (2016). TCR diversity - a universal cancer immunotherapy biomarker? *J. Immunother. Cancer* 4, 69.

Micevic, G., Thakral, D., McGeary, M., and Bosenberg, M.W. (2019). PD-L1 methylation regulates PD-L1 expression and is associated with melanoma survival. *Pigment Cell Melanoma Res.* 32, 435–440.

Newman, A.M., Liu, C.L., Green, M.R., Gentles, A.J., Feng, W., Xu, Y., Hoang, C.D., Diehn, M., and Alizadeh, A.A. (2015). Robust enumeration of cell subsets from tissue expression profiles. *Nat. Methods* 12, 453–457.

Normanno, N., De Luca, A., Bianco, C., Strizzi, L., Mancino, M., Maiello, M.R., Carotenuto, A., De Feo, G., Caponigro, F., and Salomon, D.S. (2006). Epidermal growth factor receptor (EGFR) signaling in cancer. *Gene* 366, 2–16.

Ohm, J.E., and Baylin, S.B. (2007). Stem cell chromatin patterns: an instructive mechanism for DNA hypermethylation? *Cell Cycle* 6, 1040–1043.

Pandini, G., Vigneri, R., Costantino, A., Frasca, F., Ippolito, A., Fujita-Yamaguchi, Y., Siddle, K., Goldfine, I.D., and Belfiore, A. (1999). Insulin and insulin-like growth factor-I (IGF-I) receptor overexpression in breast cancers leads to insulin/IGF-I hybrid receptor overexpression: evidence for a second mechanism of IGF-I signaling. *Clin. Cancer Res.* 5, 1935–1944.

Poh, A.R., and Ernst, M. (2018). Targeting macrophages in cancer: from bench to bedside. *Front. Oncol.* 8, 49.

Qing, T., Mohsen, H., Marczyk, M., Ye, Y., O'Meara, T., Zhao, H., Townsend, J.P., Gerstein, M., Hatzis, C., Kluger, Y., et al. (2020). Germline variant burden in cancer genes correlates with age at diagnosis and somatic mutation burden. *Nat. Commun.* 11, 2438.

Rozenblatt-Rosen, O., Regev, A., Oberdoerffer, P., Nawy, T., Hupalowska, A., Rood, J.E., Ashenberg, O., Cerami, E., Coffey, R.J., Demir, E., et al. (2020). The Human Tumor Atlas Network: Charting Tumor Transitions across Space and Time at Single-Cell Resolution. *Cell* 181, 236–249.

Schlesinger, Y., Straussman, R., Keshet, I., Farkash, S., Hecht, M., Zimmerman, J., Eden, E., Yakhini, Z., Ben-Shushan, E., Reubinoff, B.E., et al. (2007). Polycomb-mediated methylation on Lys27 of histone H3 pre-marks genes for de novo methylation in cancer. *Nat. Genet.* 39, 232–236.

Sergushichev, A. (2016). An algorithm for fast preranked gene set enrichment analysis using cumulative statistic calculation. *BioRxiv*.

Shimasaki, N., Jain, A., and Campana, D. (2020). NK cells for cancer immunotherapy. *Nat. Rev. Drug Discov.* 19, 200–218.

Smith, L.K., Boukhaled, G.M., Condotta, S.A., Mazouz, S., Guthmiller, J.J., Vijay, R., Butler, N.S., Bruneau, J., Shoukry, N.H., Krawczyk, C.M., et al. (2018). Interleukin-10 Directly Inhibits CD8+ T Cell Function by Enhancing N-Glycan Branching to Decrease Antigen Sensitivity. *Immunity* 48, 299-312.e5.

Solana, R., and Mariani, E. (2000). NK and NK/T cells in human senescence. *Vaccine* 18, 1613–1620.

Soufla, G., Sifakis, S., Baritaki, S., Zafiropoulos, A., Koumantakis, E., and Spandidos, D.A. (2005). VEGF, FGF2, TGFB1 and TGFBR1 mRNA expression levels correlate with the malignant transformation of the uterine cervix. *Cancer Lett.* 221, 105–118.

Szklarczyk, D., Gable, A.L., Lyon, D., Junge, A., Wyder, S., Huerta-Cepas, J., Simonovic, M., Doncheva, N.T., Morris, J.H., Bork, P., et al. (2019). STRING v11: protein-protein association networks with increased coverage, supporting functional discovery in genome-wide experimental datasets. *Nucleic Acids Res.* 47, D607–D613.

Taube, J.M. (2014). Unleashing the immune system: PD-1 and PD-Ls in the pre-treatment tumor microenvironment and correlation with response to PD-1/PD-L1 blockade. *Oncoimmunology* 3, e963413.

Thorsson, V., Gibbs, D.L., Brown, S.D., Wolf, D., Bortone, D.S., Ou Yang, T.-H., Porta-Pardo, E., Gao, G.F., Plaisier, C.L., Eddy, J.A., et al. (2018). The immune landscape of cancer. *Immunity* 48, 812-830.e14.

Tomasetti, C., Li, L., and Vogelstein, B. (2017). Stem cell divisions, somatic mutations, cancer etiology, and cancer prevention. *Science* 355, 1330–1334.

Velghe, A.I., Van Cauwenberghe, S., Polyansky, A.A., Chand, D., Montano-Almendras, C.P., Charni, S., Hallberg, B., Essaghir, A., and Demoulin, J.B. (2014). PDGFRA alterations in cancer: characterization of a gain-of-function V536E transmembrane mutant as well as loss-of-function and passenger mutations. *Oncogene* 33, 2568–2576.

Weinberg, S.E., Sena, L.A., and Chandel, N.S. (2015). Mitochondria in the regulation of innate and adaptive immunity. *Immunity* 42, 406–417.

Widschwendter, M., Fiegl, H., Egle, D., Mueller-Holzner, E., Spizzo, G., Marth, C., Weisenberger, D.J., Campan, M., Young, J., Jacobs, I., et al. (2007). Epigenetic stem cell signature in cancer. *Nat. Genet.* 39, 157–158.

Wolf, Y., Anderson, A.C., and Kuchroo, V.K. (2020). TIM3 comes of age as an inhibitory receptor. *Nat. Rev. Immunol.* 20, 173–185.

Yager, E.J., Ahmed, M., Lanzer, K., Randall, T.D., Woodland, D.L., and Blackman, M.A. (2008). Age-associated decline in T cell repertoire diversity leads to holes in the repertoire and impaired immunity to influenza virus. *J. Exp. Med.* 205, 711–723.

Yang, Z.-Z., Kim, H.J., Villasboas, J.C., Chen, Y.-P., Price-Troska, T., Jalali, S., Wilson, M., Novak, A.J., and Ansell, S.M. (2017). Expression of LAG-3 defines exhaustion of intratumoral PD-1+ T cells and correlates with poor outcome in follicular lymphoma. *Oncotarget* 8, 61425–61439.

Yarchoan, M., Hopkins, A., and Jaffee, E.M. (2017). Tumor Mutational Burden and Response Rate to PD-1 Inhibition. *N. Engl. J. Med.* 377, 2500–2501.



## Figures

Figure 1 - Macrophages increase and T cells decrease with age in the ITME

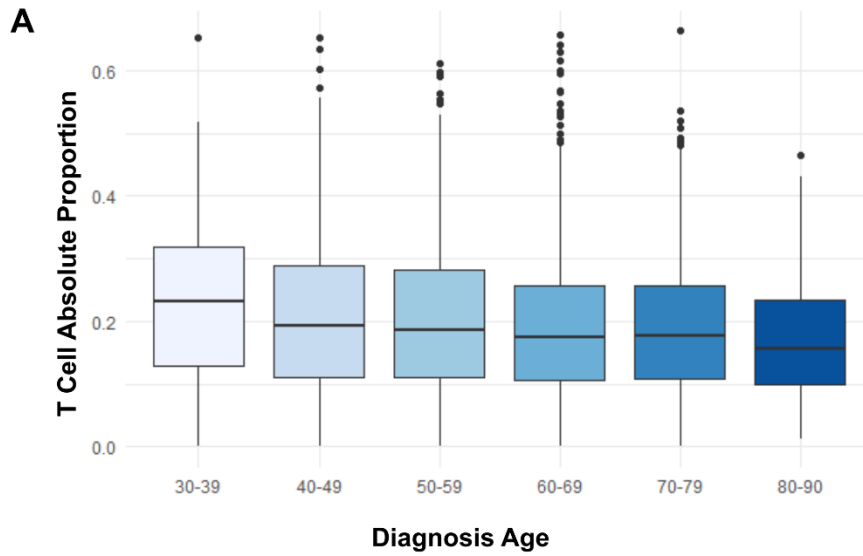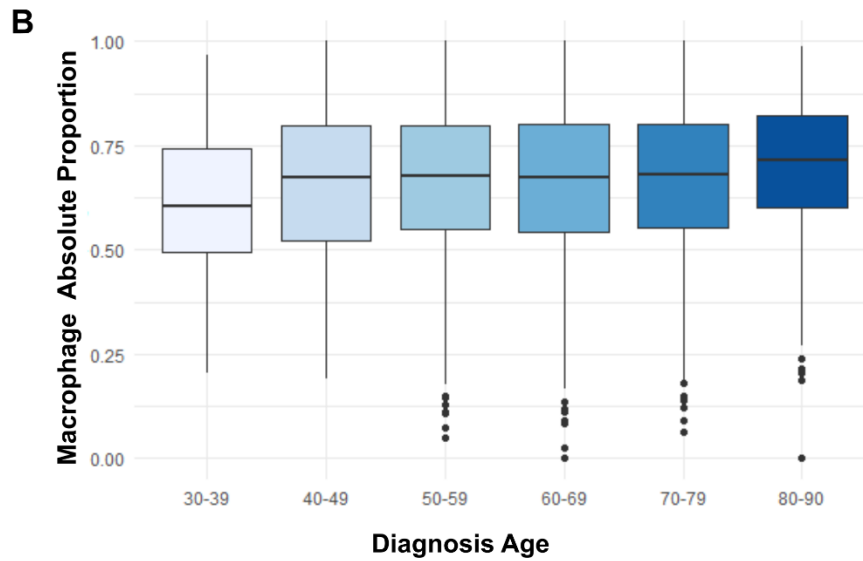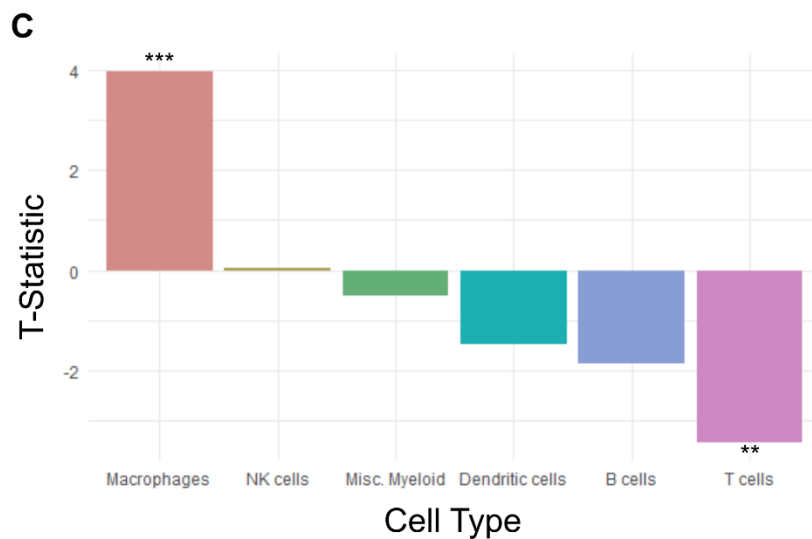

**A** Boxplots representing the pan-cancer change in T cell absolute proportion across different age groups from TCGA. A significant downward trend is observed based on a covariate-adjusted linear model **B** Boxplots representing the change in macrophage absolute proportion across age groups in TCGA. A significant upward trend is observed based on a covariate-adjusted linear model **C** Barplot of the t-statistics for the diagnosis age term of the linear models fit to each immune cell type from TCGA, including sex and cancer type as covariates. \*\* indicates an adjusted p-value less than 0.01 and \*\*\* indicates less than 0.001.

Figure 2 - Immune infiltration shifts with age and prognostics

**A**

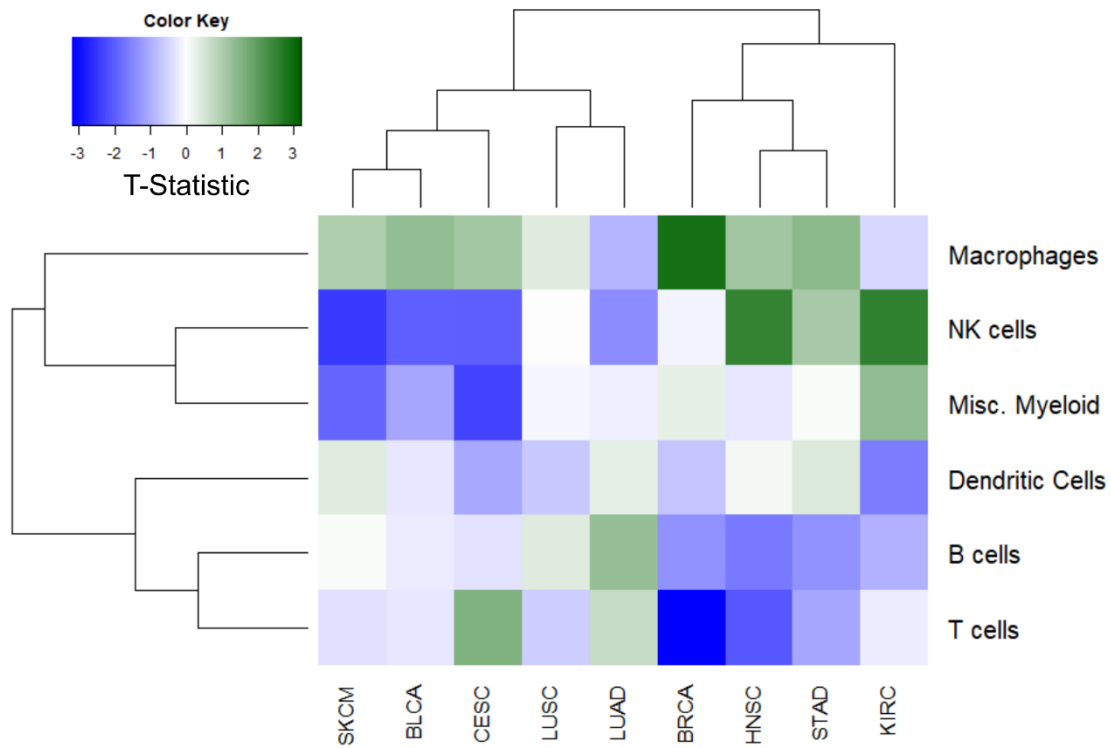

**B**

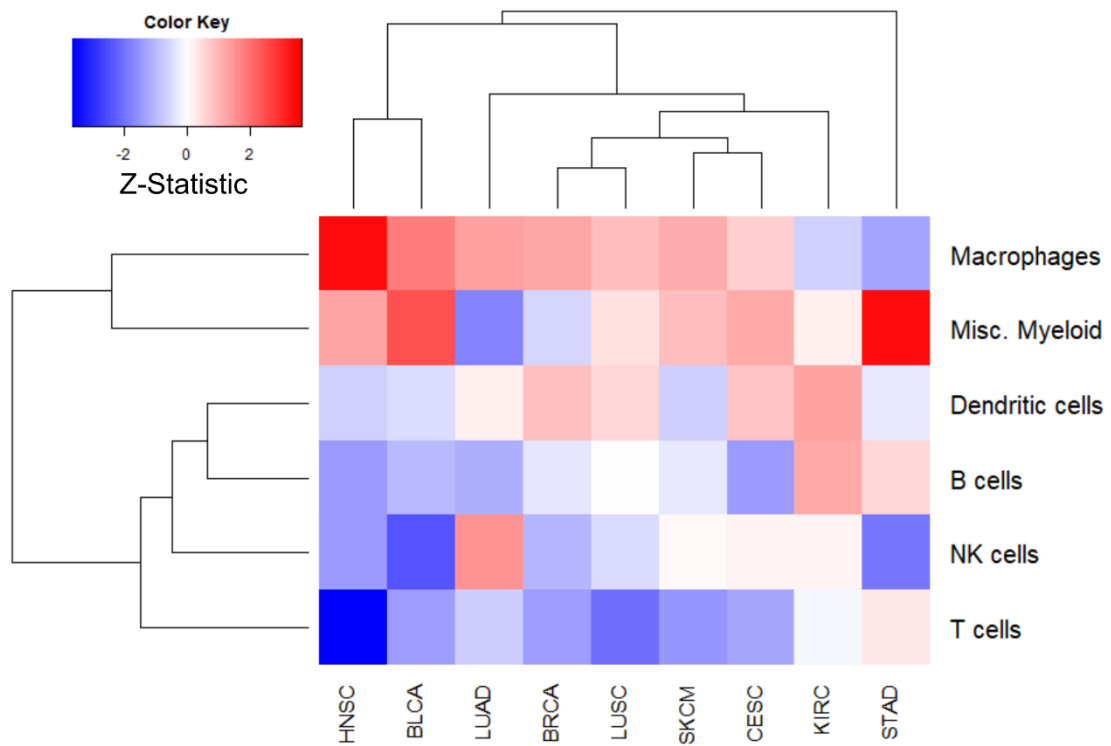

Age and survival association of immune cell types within cancer types. **A** Heatmap of the T-statistics from the covariate-adjusted linear model fit for the association of each immune cell type to age. Each square represents the significance of the diagnosis age term within a linear model for the labeled immune cell type, plotted for each cancer type in TCGA with at least 100 patients after filtering for significant immune deconvolution results. We observe that macrophages generally increase in abundance with age, while T cells and B cells generally decrease in abundance. **B** Heatmap of the covariate-adjusted Cox proportional hazards where each square represents the z-statistic for the survival prognostic of each immune cell type within each cancer type in TCGA with at least 100 patients after filtering. We observe that macrophages and other Myeloid cells are generally poor prognostics and that T cells are generally good prognostics.

Figure 3 - Immune changes with age in healthy tissues

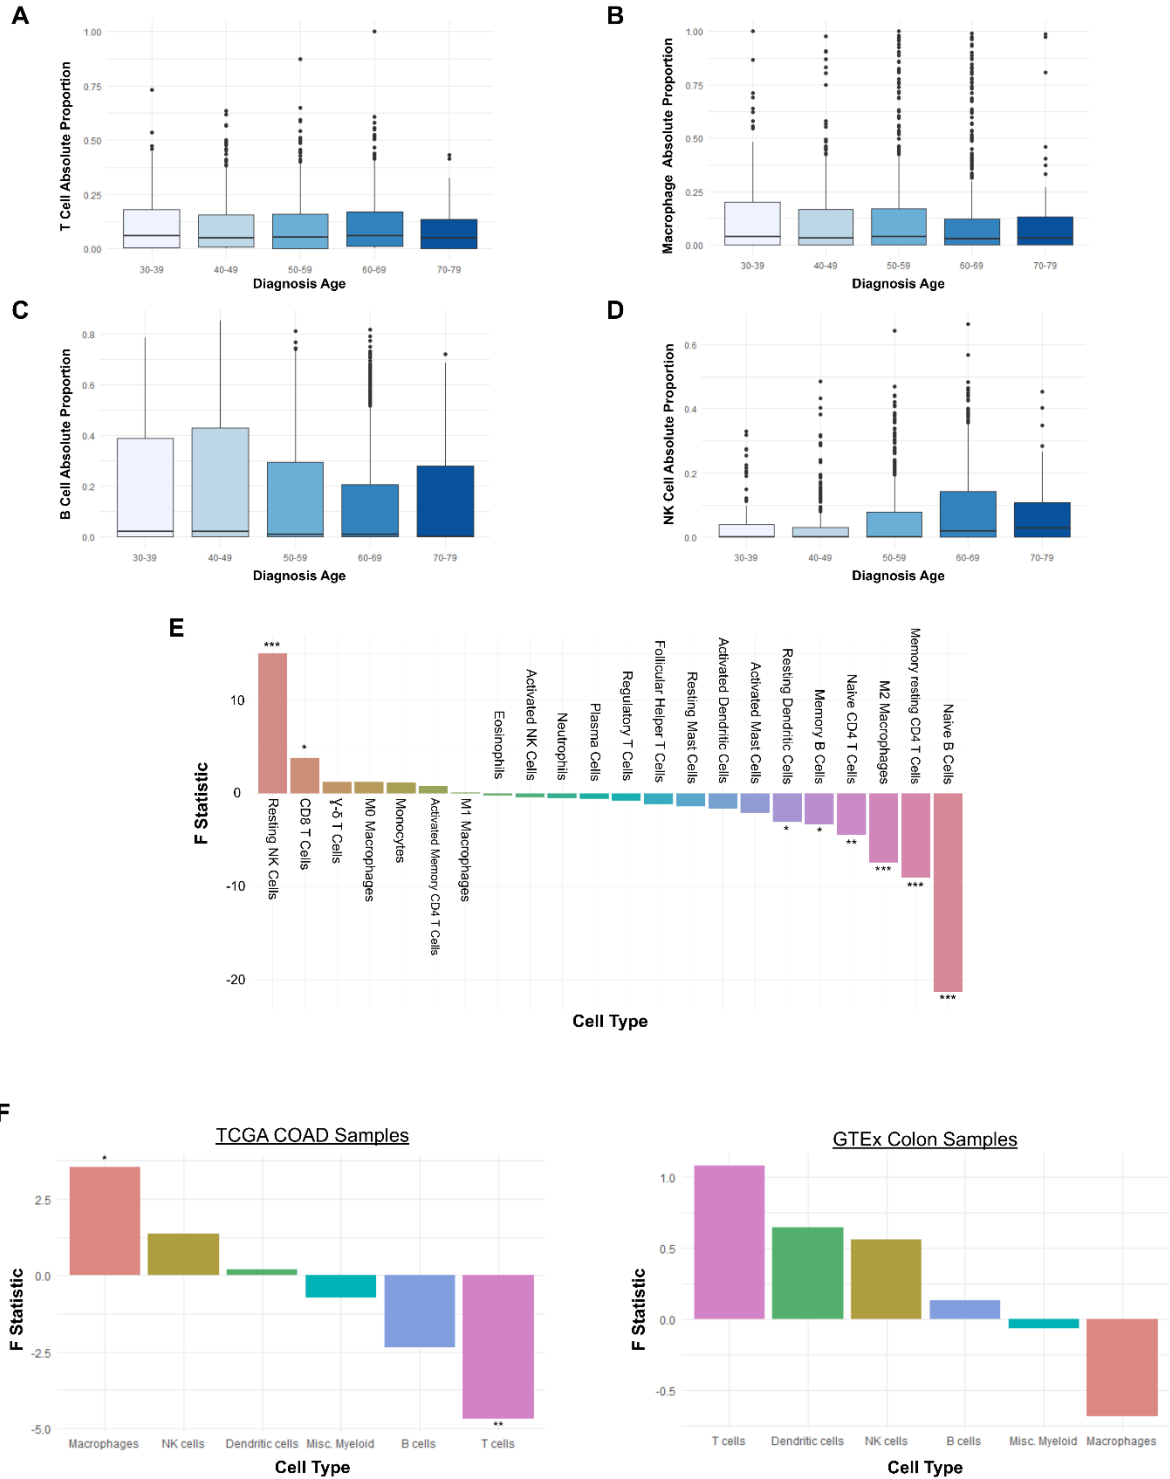

GTEx immune cell changes with age. **A-D** Immune abundance with age in GTEx tissues for T cells, Macrophages, B cells, and NK cells, respectively. **E** Age associations of 22 immune subtypes in GTEx tissues. Plotted by the F statistic for an ANOVA across age groups. **F**

Comparison of F statistics for ANOVA across age groups for TCGA Colon Adenocarcinomas (COAD) against GTEx Colon samples. Opposite trends with age are observed for macrophages and T cells in this tissue. \* indicates a p-value less than 0.05 and \*\* 0.01.

Figure 4 - Corresponding methylation and expression changes with age

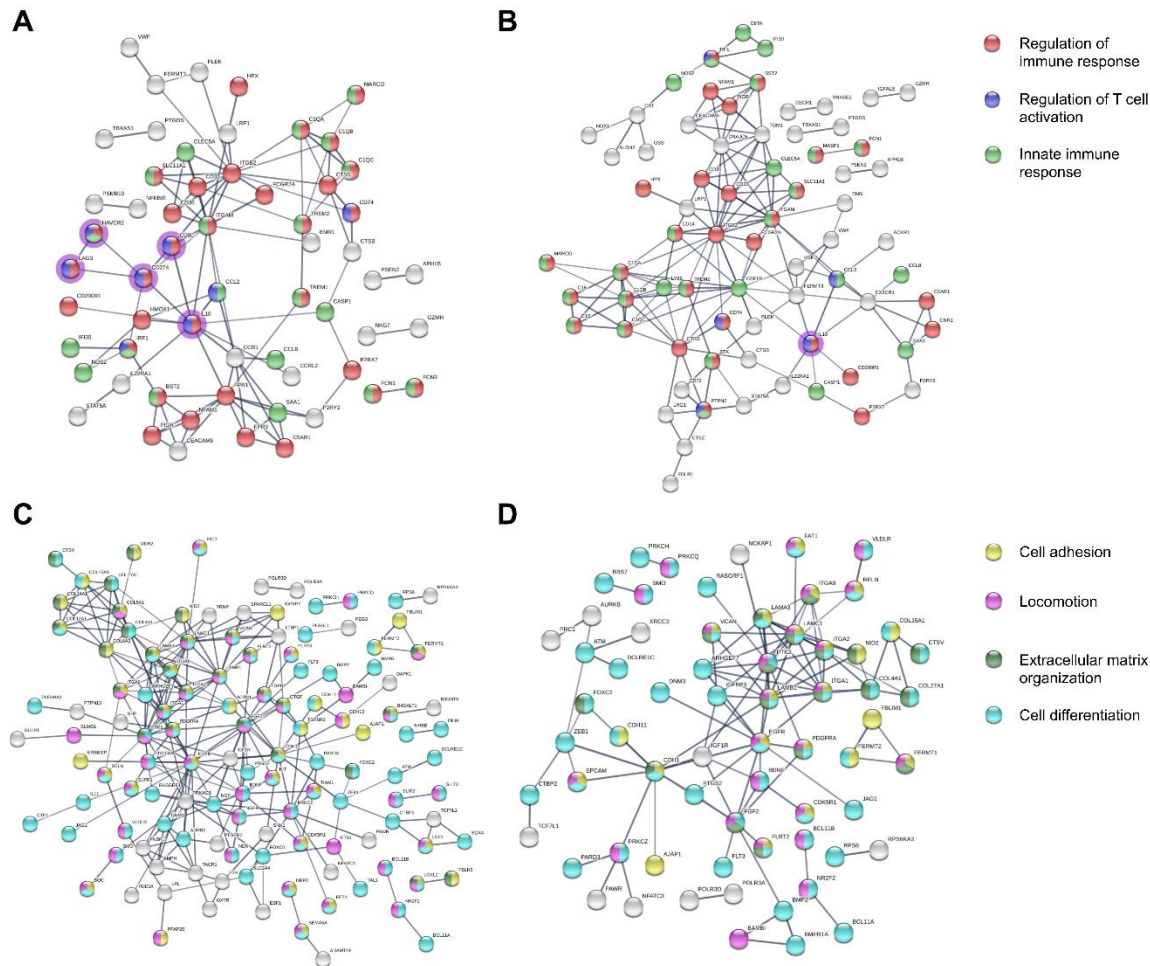

STRING Database queries for all genes with significantly **A** increased expression and decreased methylation with age, where genes that have previously been strongly associated with decreased T cell cytotoxicity have a purple halo **B** increased expression and decreased methylation with age, adjusting for tumor mutation count, where genes that have previously been strongly associated with decreased T cell cytotoxicity have a purple halo **C** decreased expression and increased methylation with age, **D** decreased expression and increased methylation with age, adjusting for tumor mutation count.

Table 1

|                        | <b>Estimate</b> | <b>Standard Error</b> | <b>t-value</b> | <b>p-value</b> | <b>q-value</b> |
|------------------------|-----------------|-----------------------|----------------|----------------|----------------|
| <b>T cells</b>         | -0.0006         | 0.000175              | -3.44233       | 0.000585       | 0.001754       |
| <b>Macrophages</b>     | 0.001075        | 0.000271              | 3.967909       | 7.42E-05       | 0.000445       |
| <b>B cells</b>         | -0.00028        | 0.000149              | -1.87737       | 0.060566       | 0.121131       |
| <b>NK cells</b>        | 3.82E-06        | 6.89E-05              | 0.055398       | 0.955826       | 0.955826       |
| <b>Dendritic cells</b> | -0.00015        | 9.77E-05              | -1.49017       | 0.136286       | 0.204429       |
| <b>Misc. Myeloid</b>   | -4.97E-05       | 9.92E-05              | -0.50055       | 0.616722       | 0.740066       |

Coefficients, statistics, p, and q-values for the diagnosis age term in the linear model fit for each immune cell type. Cancer type and sex were included as covariates for each of these models.

Table 2

|                        | <b>Coefficient</b> | <b>exp(Coef.)</b> | <b>z-statistic</b> | <b>p-value</b> | <b>q-value</b> |
|------------------------|--------------------|-------------------|--------------------|----------------|----------------|
| <b>T cells</b>         | -1.25217           | 0.285882          | -3.9169            | 8.97E-05       | 0.000538       |
| <b>Macrophages</b>     | 0.694023           | 2.001752          | 3.460928           | 0.000538       | 0.001615       |
| <b>B cells</b>         | -0.52134           | 0.593723          | -1.43318           | 0.151808       | 0.227711       |
| <b>NK cells</b>        | -1.99242           | 0.136365          | -2.48022           | 0.01313        | 0.026261       |
| <b>Dendritic cells</b> | 0.18663            | 1.205181          | 0.368952           | 0.712164       | 0.712164       |
| <b>Misc. Myeloid</b>   | 0.516746           | 1.676563          | 0.99876            | 0.317911       | 0.381493       |

Coefficients, statistics, p, and q-values for each immune cell term in a Cox proportional hazards model fit to predict overall patient survival, including diagnosis age, sex, cancer type, and number of years smoked as covariates.



Table 3

|                                    |                      | <b>Coefficient</b> | <b>Statistic</b> | <b>p-value</b> |
|------------------------------------|----------------------|--------------------|------------------|----------------|
| <b>TCR Clonality</b>               | <b>Diagnosis Age</b> | -0.00509           | -5.6694          | 1.48E-08       |
|                                    | <b>Cox Hazards</b>   | -0.08812           | -4.14902         | 3.34E-05       |
| <b>Log Tumor Mutational Burden</b> | <b>Diagnosis Age</b> | 0.0102449          | 13.454           | 6.88E-41       |
|                                    | <b>Cox Hazards</b>   | -0.053340          | -2.542           | 0.011          |

Coefficients, statistics, and p-values for the age term of the linear model for both TCR clonality and number of tumor mutations in TCGA data, with cancer type included as a covariate. These values are also listed for the TCR clonality term and the log number of tumor mutations term from a Cox proportional hazards model fit to overall survival with diagnosis age and cancer type included as covariates.

Table 4

|                                                 | <b>Gene</b>  | <b>LogFC</b> | <b>t-statistic</b> | <b>p-value</b> | <b>q-value</b> |
|-------------------------------------------------|--------------|--------------|--------------------|----------------|----------------|
| <b>Age +<br/>Cancer Type<br/>Adjusted</b>       | <b>CD80</b>  | 0.00361      | 3.002352           | 0.002686       | 0.011553       |
|                                                 | <b>CD274</b> | 0.003053     | 2.612337           | 0.009007       | 0.029899       |
|                                                 | <b>CD86</b>  | 0.002146     | 2.130932           | 0.03312        | 0.083376       |
|                                                 | <b>CTLA4</b> | -0.00084     | -0.5747            | 0.56551        | 0.69286        |
|                                                 | <b>PDCD1</b> | -0.00062     | -0.42127           | 0.67357        | 0.778683       |
| <b>+<br/>Mutational<br/>Burden<br/>Adjusted</b> | <b>CD80</b>  | 0.002983     | -0.90527           | 2.38488        | 0.017105       |
|                                                 | <b>CD86</b>  | 0.002127     | 2.9119             | 2.035515       | 0.041828       |
|                                                 | <b>CD274</b> | 0.00198      | 2.124811           | 1.618133       | 0.105669       |
|                                                 | <b>CTLA4</b> | -0.00204     | 0.12074            | -1.34813       | 0.177652       |
|                                                 | <b>PDCD1</b> | -0.002       | 0.334003           | -1.30557       | 0.191731       |

Differential expression results for immune checkpoint genes involved in currently available ICB immunotherapies. The results are shown for the association with age, both including tumor mutational burden as a covariate and without.

## Supplemental Figures

### Supplemental Figure 1

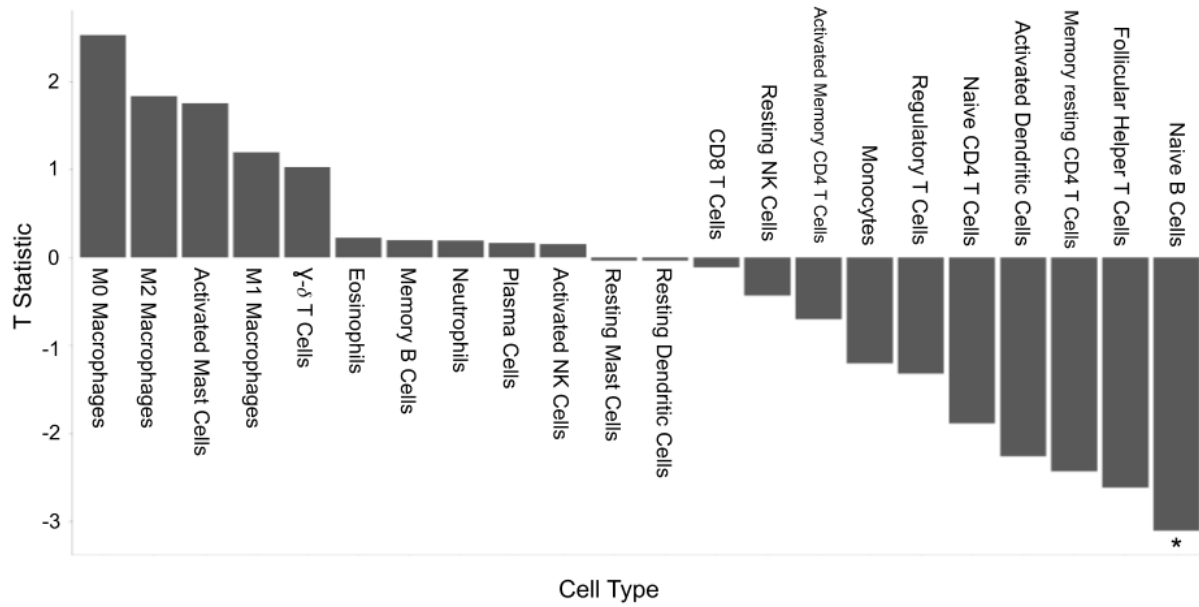

T statistics for the linear association of 22 immune cell subtypes with age pan-cancer within TCGA data. Naive B cells statistically significantly decrease with age. \* indicates q-value less than 0.05.

Supplemental Figure 2

**A**

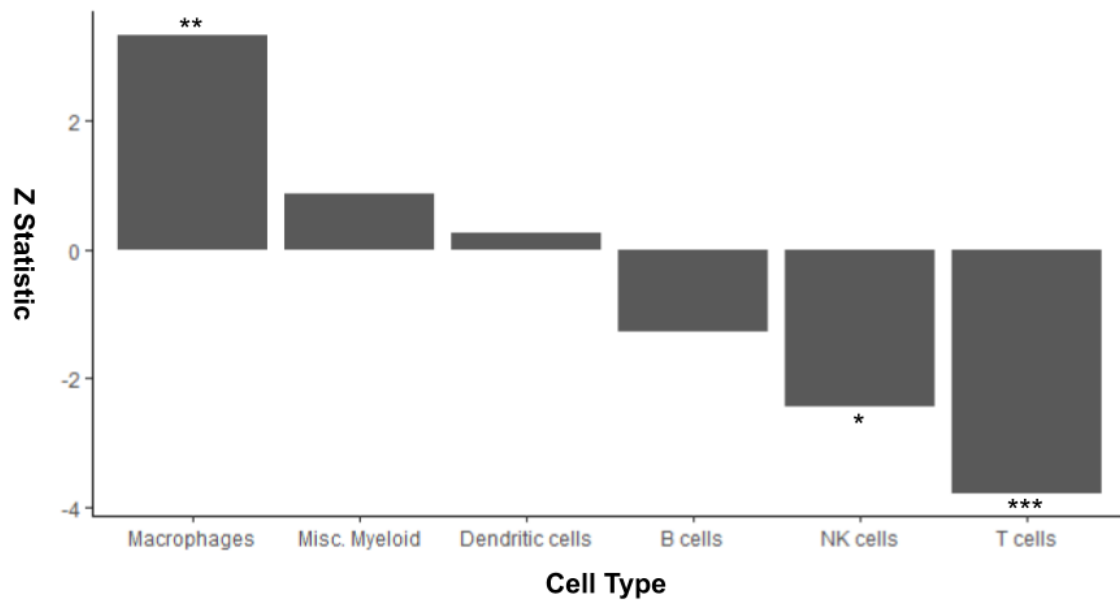

**B**

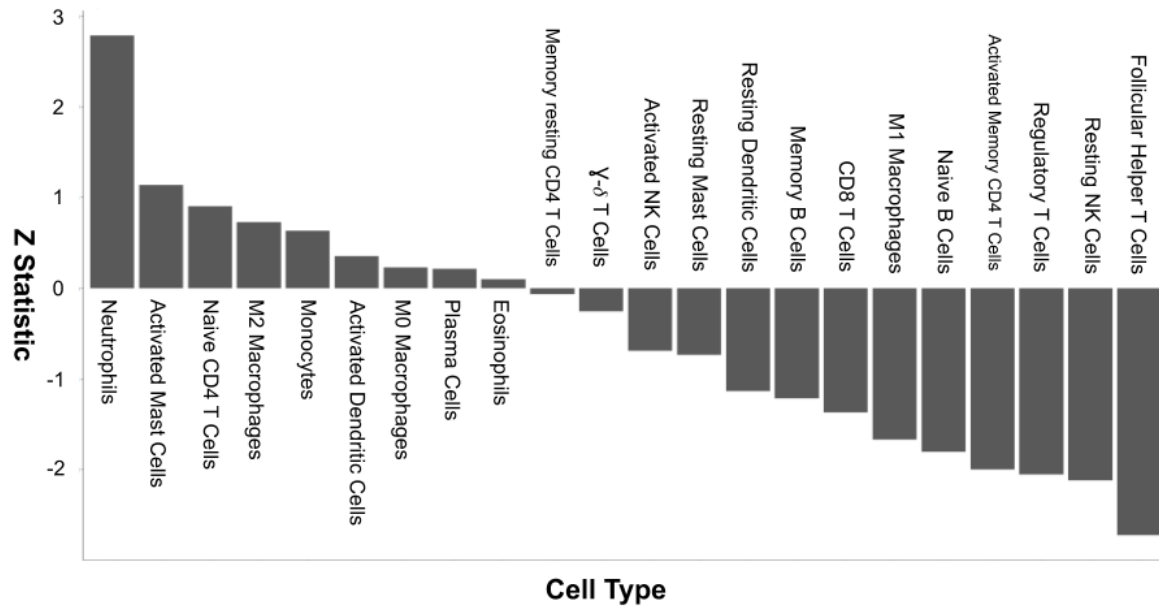

**A** Z-statistics for the survival associations of immune cell types pan-cancer as evaluated by a Cox proportional hazards model, including age, sex, cancer type, and smoking years as covariates. **B** Z-statistics for the survival associations of 22 immune cell subtypes as evaluated by a Cox proportional hazards model for overall patient survival pan-cancer including age, sex, cancer type, and smoking years as covariates. \* indicates a p-value less than 0.05, \*\* 0.01, and \*\*\* 0.001.

### Supplemental Figure 3

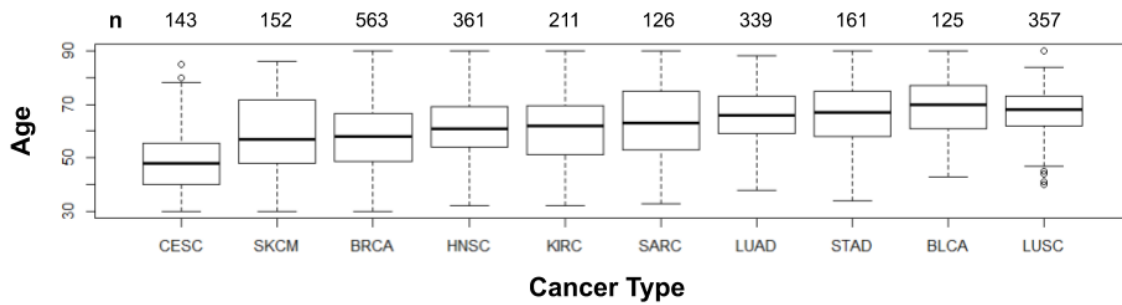

Boxplot of the age demographic for each of the cancer types with at least 100 observations that were successfully deconvolved by immune cell type. The number of patients with each cancer is plotted above.

### Supplemental Figure 4

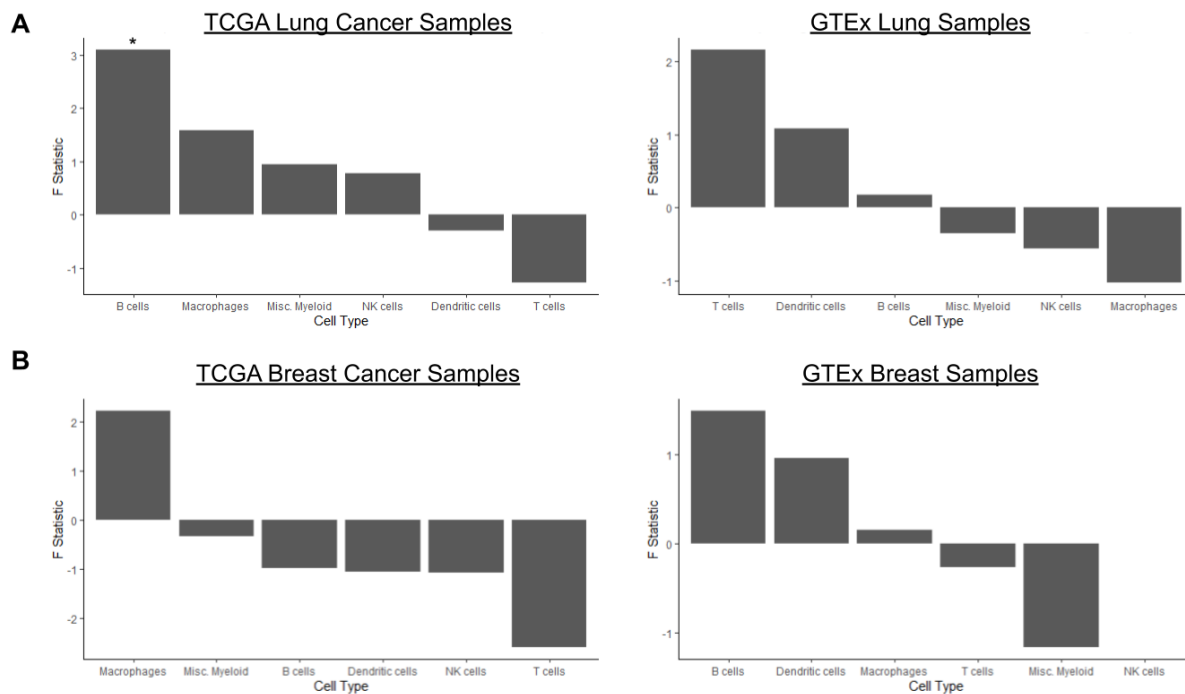

Association of immune cell type and age. The F statistic for the diagnosis age term of an ANOVA for each immune cell type (including age and sex as covariates) is used to compare **A** lung cancers to healthy lung tissue samples and **B** breast cancers to healthy breast tissue samples. \* indicates a p-value less than 0.05.

## Supplemental Figure 5

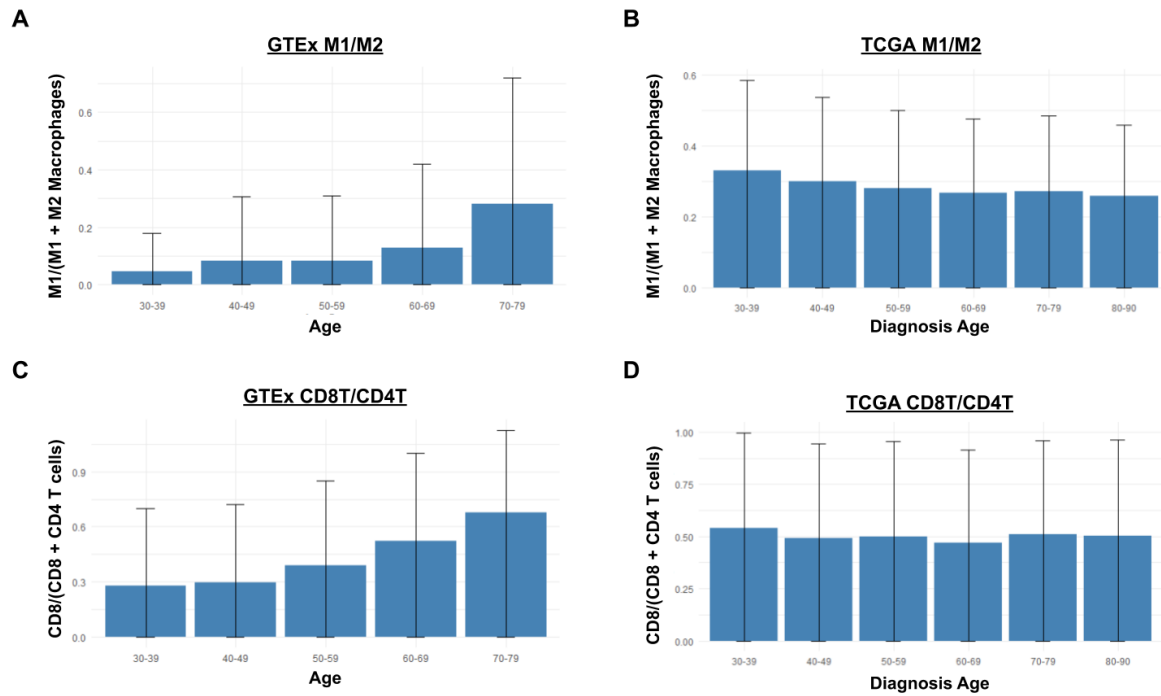

Comparing immune cell ratios of potential functional importance between TCGA and GTEx. **A-B** The proportion of M1 to M2 Macrophages in GTEx across tissues and TCGA pan-cancer, respectively. There is a significant increase in M1/M2 ratio in GTEx tissues with age, while there is no significant shift in TCGA. **C-D** Proportion of CD8 T cells to CD4 T cells with age in GTEx across tissues and TCGA pan-cancer, respectively. There is a significant increase in CD8/CD4 ratio in GTEx tissues with age, while there is no significant shift in TCGA.

## Supplemental Figure 6

**A**

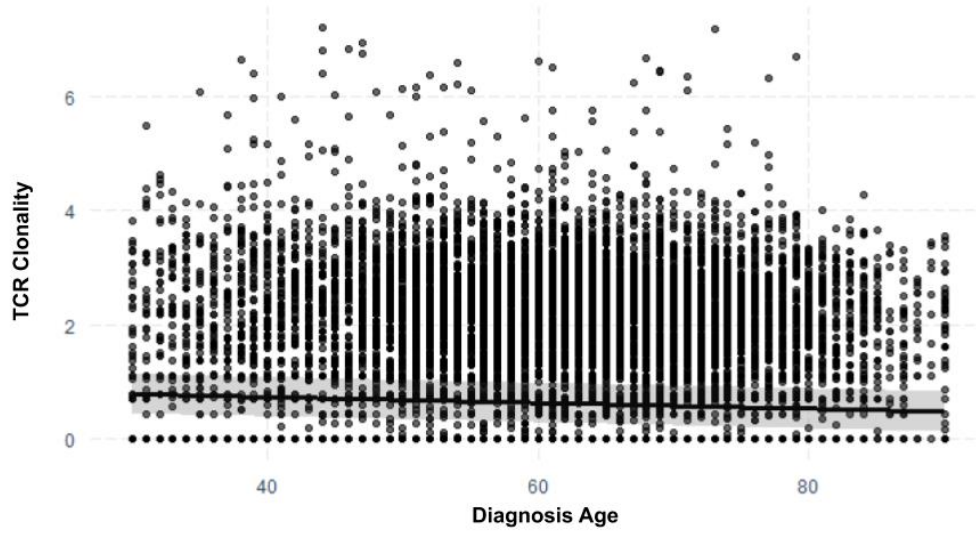

**B**

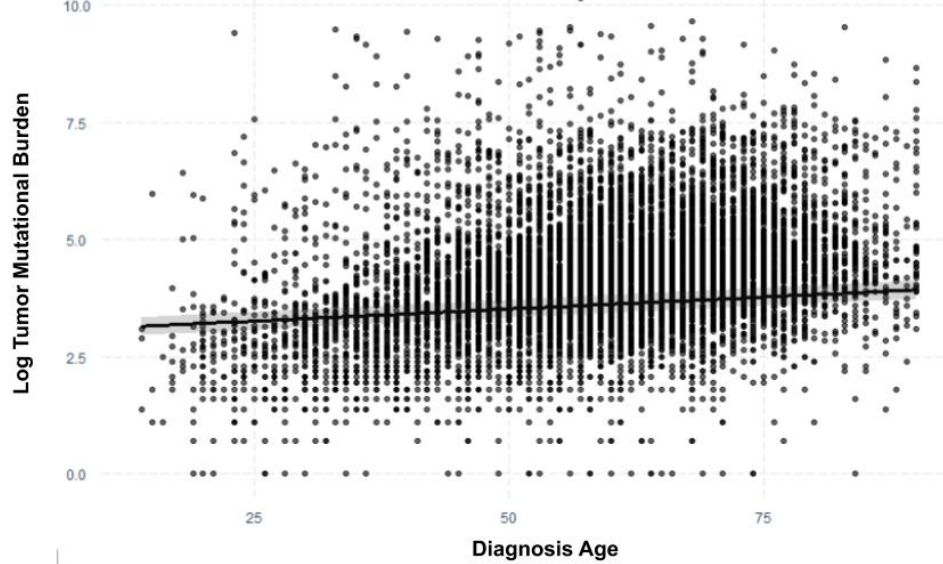

**C**

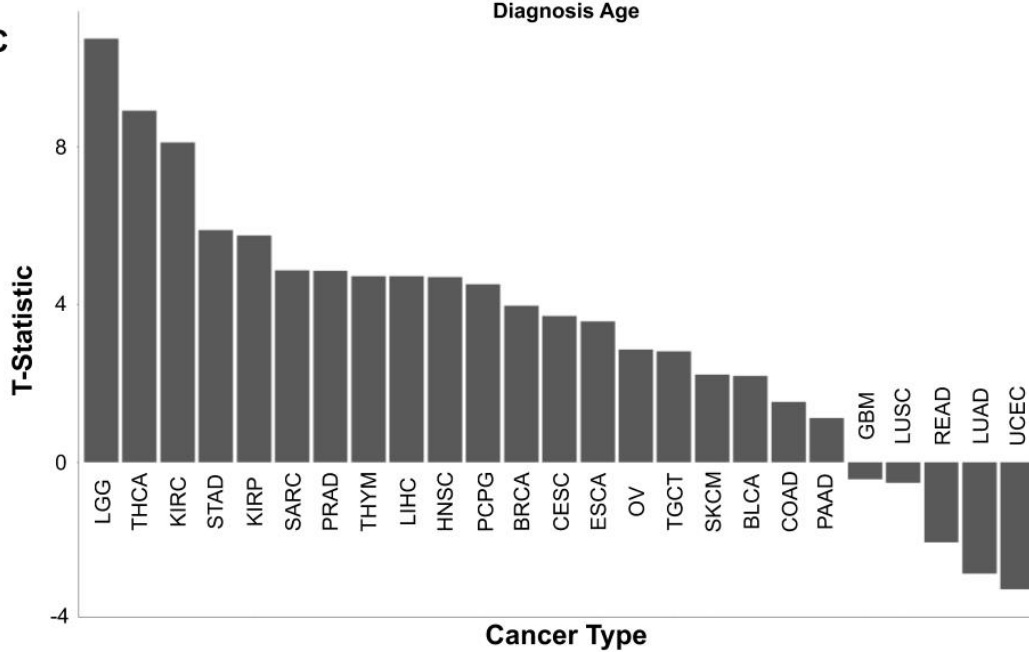

**A** Read normalized Shannon entropy of T cell receptor sequences plotted against age. The line fit to the data is a linear model of TCR clonality predicted by age, adjusted for sex and cancer type. **B** The log-normalized number of mutations found in each tumor sample is plotted against diagnosis age. The line fit to the data is a linear model of log-normalized number of mutations predicted by age, adjusted for sex and cancer type. **C** The T-statistic for the diagnosis age term of the linear model predicting the log normalized number of mutations for each cancer type.

Supplemental Figure 7

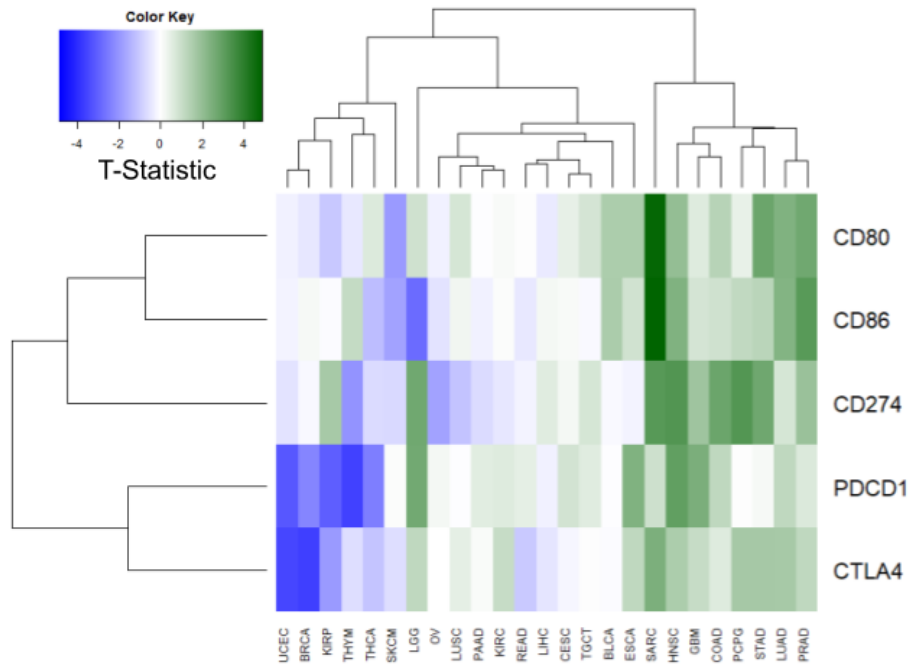

The association of immune checkpoint blockade genes with age across all cancer types with at least 100 samples in TCGA as determined by the t-statistic from limma-voom differential expression analysis.



## Supplemental Figure 8

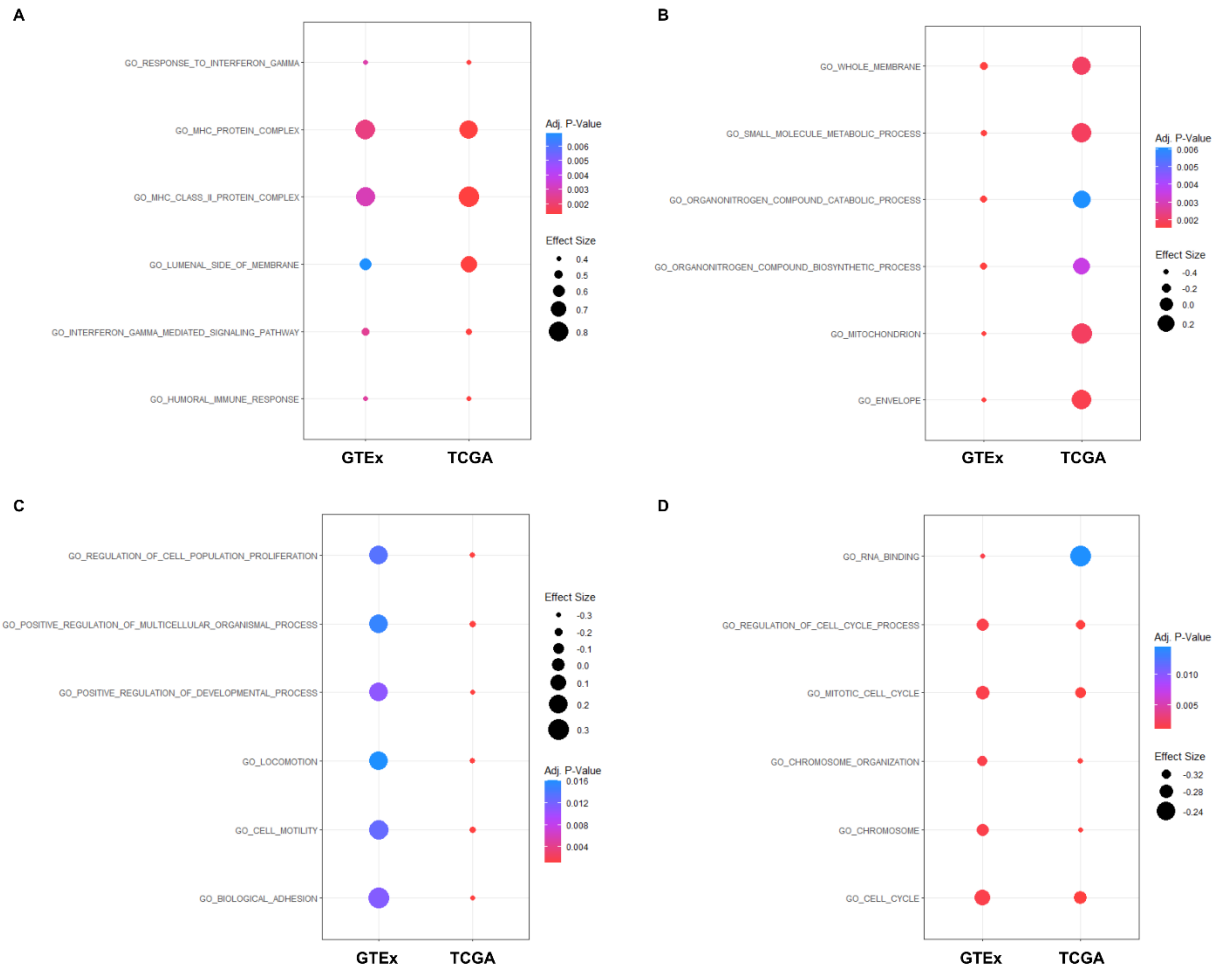

Dot plots representing gene set enrichment analysis for genes differentially expressed with age for both TCGA and GTEx. **A** Pathways significantly up in both TCGA and GTEx with age **B** Pathways significantly up in TCGA and down in GTEx with age **C** Pathways significantly up in GTEx and down in TCGA with age **D** Pathways significantly down in both TCGA and GTEx with age.

## Supplemental Figure 9

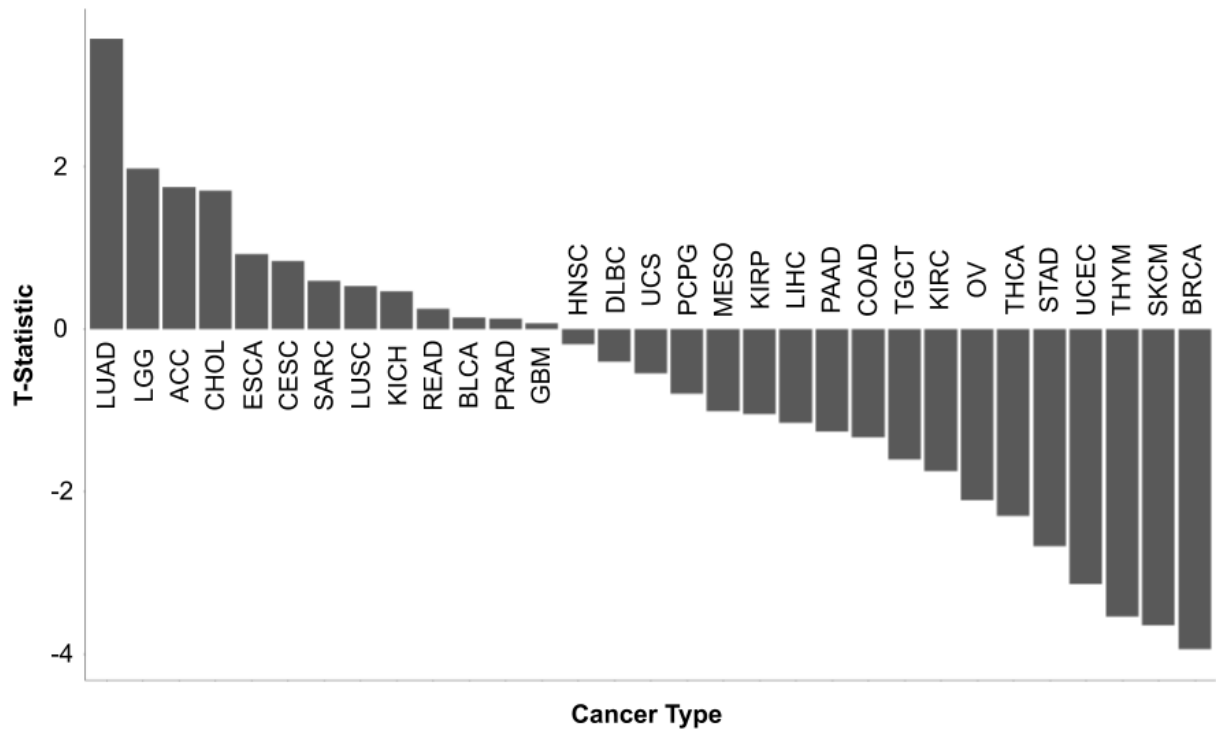

The association of TCR clonality and age is plotted for each cancer type in TCGA using the t-statistic from the diagnosis age term of a linear model fit to the TCR clonality of each cancer type, adjusting for sex as a covariate.

Supplemental Figure 10

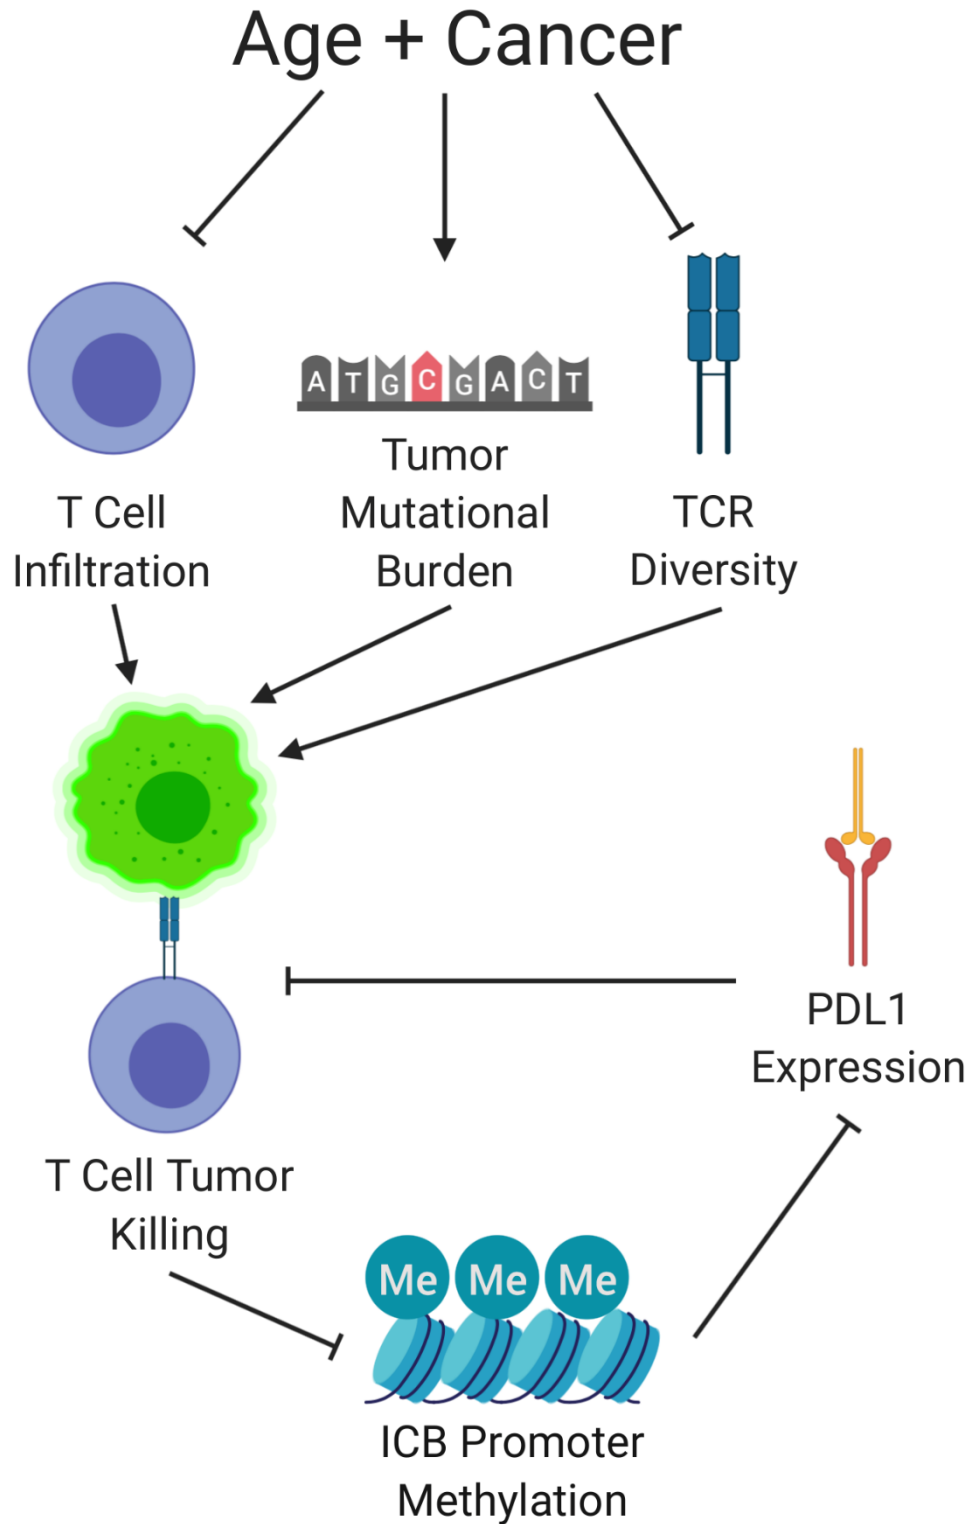

Hypothesized model for how the age-related effects we have observed affect T cell anti-tumor

activity and expression of PDL1.

Supplemental Table 1

| <b>Immune Cell Types</b> | <b>Immune Subtypes</b>                                                                                                                                       |
|--------------------------|--------------------------------------------------------------------------------------------------------------------------------------------------------------|
| T cells                  | CD8 T cells, Naive CD4 T cells, Resting Memory Cd4 T cells, Activated Memory CD4 T cells, Follicular Helper T cells, Regulatory T cells, Gamma Delta T cells |
| Macrophages              | M0 Macrophages, M1 Macrophages, M2 Macrophages                                                                                                               |
| B cells                  | Naive B cells, Memory B cells, Plasma Cells                                                                                                                  |
| NK cells                 | Resting NK cells, Activated NK cells                                                                                                                         |
| Dendritic cells          | Resting Dendritic cells, Activated Dendritic cells                                                                                                           |
| Misc. Myeloid cells      | Monocytes, Resting Mast cells, Activated Mast cells, Eosinophils, Neutrophils                                                                                |

Immune cell types that were evaluated in relation to age for both TCGA tumor samples and GTEx normal samples.

Supplemental Table 2

|                        | <b>F-statistic</b> | <b>p-value</b> | <b>q-value</b> |
|------------------------|--------------------|----------------|----------------|
| <b>T cells</b>         | 0.887307           | 0.470706       | 0.564847       |
| <b>Macrophages</b>     | 0.981287           | 0.416576       | 0.564847       |
| <b>B cells</b>         | 5.835976           | 0.000117       | 0.00035        |
| <b>NK cells</b>        | 19.34786           | 1.54E-15       | 9.27E-15       |
| <b>Dendritic cells</b> | 2.265888           | 0.060047       | 0.120095       |
| <b>Misc. Myeloid</b>   | 0.647328           | 0.628807       | 0.628807       |

F-statistic, p, and q-values for each immune cell term in an ANOVA for the effect of age on the abundance of each immune cell type. Tissue and sex were included in the model as covariates.

Supplemental Table 3

|                            |                 | Up Expressed | Down Expressed |
|----------------------------|-----------------|--------------|----------------|
| Age, Cancer Type Adjusted  | Up Methylated   | 66           | <b>218</b>     |
|                            | Down Methylated | <b>113</b>   | 94             |
| Mutational Burden Adjusted | Up Methylated   | 62           | <b>135</b>     |
|                            | Down Methylated | <b>129</b>   | 86             |

Number of genes differentially methylated and differentially expressed among immune related genes from TCGA samples. The genes with a canonical relationship between methylation and expression are in bold. The comparison is made both including and not including mutational burden as a covariate.

Supplemental Table 4

|            | TCGA | GTE <sub>x</sub> |
|------------|------|------------------|
| Subjects   | 8984 | 980              |
| Males      | 4367 | 653              |
| Females    | 4617 | 327              |
| Age 20-29* | N/A  | 84               |
| Age 30-39  | 667  | 78               |
| Age 40-49  | 1226 | 153              |
| Age 50-59  | 2106 | 315              |
| Age 60-69  | 2453 | 317              |
| Age 70-79  | 1693 | 33               |
| Age 80-90  | 504  | 0                |

Basic demographic information used as covariates in the analyses conducted in this study comparing the TCGA and GTEx cohorts.

\*Age 20-29 was excluded from the TCGA patients collected (See Materials and Methods) and for comparison these individuals were excluded from the final analysis of GTEx data as well

Supplemental Table 5

| <b>Tissue</b>  | <b>Number of Samples</b> |
|----------------|--------------------------|
| Adipose Tissue | 1204                     |
| Adrenal Gland  | 258                      |
| Bladder        | 21                       |
| Blood          | 929                      |
| Blood Vessel   | 1335                     |
| Brain          | 2642                     |
| Breast         | 459                      |
| Cervix Uteri   | 19                       |
| Colon          | 779                      |
| Esophagus      | 1445                     |

|                 |      |
|-----------------|------|
| Fallopian Tube  | 9    |
| Heart           | 861  |
| Kidney          | 89   |
| Liver           | 226  |
| Lung            | 578  |
| Muscle          | 803  |
| Nerve           | 619  |
| Ovary           | 180  |
| Pancreas        | 328  |
| Pituitary       | 283  |
| Prostate        | 245  |
| Salivary Gland  | 162  |
| Skin            | 1809 |
| Small Intestine | 187  |
| Spleen          | 241  |
| Stomach         | 359  |

|         |     |
|---------|-----|
| Testis  | 361 |
| Thyroid | 653 |
| Uterus  | 142 |
| Vagina  | 156 |

Number of RNA-seq samples from each tissue in GTEx data used.

Supplemental Table 6

| <b>TCGA<br/>Cancer<br/>Type<br/>Acronym</b> | <b>Number<br/>of<br/>Samples</b> |
|---------------------------------------------|----------------------------------|
| ACC                                         | 64                               |
| BLCA                                        | 405                              |
| BRCA                                        | 1056                             |
| CESC                                        | 270                              |
| CHOL                                        | 35                               |
| COAD                                        | 272                              |
| DLBC                                        | 45                               |
| ESCA                                        | 180                              |
| GBM                                         | 148                              |



|      |     |
|------|-----|
| HNSC | 507 |
| KICH | 61  |
| KIRC | 508 |
| KIRP | 276 |
| LAML | 158 |
| LGG  | 433 |
| LIHC | 347 |
| LUAD | 479 |
| LUSC | 474 |
| MESO | 86  |
| OV   | 292 |
| PAAD | 177 |
| PCPG | 157 |
| PRAD | 480 |
| READ | 88  |
| SARC | 244 |
| SKCM | 411 |

|      |     |
|------|-----|
| STAD | 403 |
| TGCT | 74  |
| THCA | 433 |
| THYM | 116 |
| UCEC | 169 |
| UCS  | 57  |
| UVM  | 79  |

Number of RNA-seq samples from each TCGA study in the TCGA data used in this work.
